1 **Interleukin-11 is a Marker for Both Cancer- and Inflammation-Associated**

2 **Fibroblasts that Contribute to Colorectal Cancer Progression**

3

4 Takashi Nishina<sup>1,\*</sup>, Yutaka Deguchi<sup>1</sup>, Wakami Takeda<sup>1,2</sup>, Masato Ohtsuka<sup>3,4</sup>, Daisuke

5 Ohshima<sup>5</sup>, Soh Yamazaki<sup>1</sup>, Mika Kawauchi<sup>1</sup>, Eri Nakamura<sup>6</sup>, Chiharu Nishiyama<sup>2</sup>,

6 Yuko Kojima<sup>7</sup>, Satomi Adachi-Akahane<sup>5</sup>, Mizuho Hasegawa<sup>8</sup>, Mizuho Nakayama<sup>9</sup>,

7 Masanobu Oshima<sup>9</sup>, Hideo Yagita<sup>10</sup>, Kazutoshi Shibuya<sup>11</sup>, Tetuo Mikami<sup>12</sup>, Naohiro

8 Inohara<sup>8</sup>, Norihiro Tada<sup>6</sup>, Hiroyasu Nakano<sup>1, 13, 14\*</sup>

9

10 <sup>1</sup>Department of Biochemistry, Toho University School of Medicine, 5-21-16

11 Omori-Nishi, Ota-ku, Tokyo 143-8540, Japan.

12 <sup>2</sup>Laboratory of Molecular Biology and Immunology, Department of Biological Science

13 and Technology, Faculty of Industrial Science and Technology, Tokyo University of

14 Science, 6-3-1 Niijuku, Katsushika-ku, Tokyo, 125-8585, Japan.

15 <sup>3</sup>Department of Molecular Life Science, Division of Basic Medical Science and

16 Molecular Medicine, School of Medicine, Tokai University, 143 Shimokasuya, Isehara,

17 Kanagawa, 259-1193, Japan.

18 <sup>4</sup>The Institute of Medical Sciences, Tokai University, 143 Shimokasuya, Isehara,

19 Kanagawa, 259-1193, Japan.

20 <sup>5</sup>Department of Physiology, Toho University School of Medicine, 5-21-16 Omori-Nishi,

21 Ota-ku, Tokyo 143-8540, Japan.

22 <sup>6</sup>Research Institute for Diseases of Old Age, Juntendo University School of Medicine,

23 2-1-1 Hongo, Bunkyo-ku, Tokyo 113-8421, Japan.

24 <sup>7</sup>Laboratory of Morphology and Image Analysis, Research Support Center, Juntendo

25 University Graduate School of Medicine, Tokyo 113-8421, Japan.

26 <sup>8</sup>Department of Pathology, University of Michigan Medical School, Ann Arbor, MI

27 48109, USA.

28 <sup>9</sup>WPI Nano Life Science Institute (WPI-Nano LSI), Division of Genetics, Cancer

29 Research Institute, Kanazawa University, Kanazawa, Ishikawa 920-1192, Japan.

30 <sup>10</sup>Department of Immunology, Juntendo University Graduate School of Medicine, 2-1-1

31 Hongo, Bunkyo-ku, Tokyo 113-8421, Japan.

32 <sup>11</sup>Department of Surgical Pathology, Toho University School of Medicine, 5-21-16

33 Omori-Nishi, Ota-ku, Tokyo 143-8540, Japan.

34 <sup>12</sup>Department of Pathology, Toho University School of Medicine, 5-21-16 Omori-Nishi,

35 Ota-ku, Tokyo 143-8540, Japan.

36 <sup>13</sup>Host Defense Research Center, Toho University School of Medicine, 5-21-16

37 Omori-Nishi, Ota-ku, Tokyo 143-8540, Japan.

38 <sup>13</sup>Lead contact.

39 \*To whom correspondence should be addressed. E-mail:

40 [takashi.nishina@med.toho-u.ac.jp](mailto:takashi.nishina@med.toho-u.ac.jp) or [hiroyasu.nakano@med.toho-u.ac.jp](mailto:hiroyasu.nakano@med.toho-u.ac.jp)

41

42 **SUMMARY**

43 Interleukin (IL)-11 is a member of the IL-6 family of cytokines and involved in multiple  
44 cellular responses, including tumor development. However, the origin and functions of  
45 IL-11-producing (IL-11<sup>+</sup>) cells are not fully understood. To characterize IL-11<sup>+</sup> cells *in*  
46 *vivo*, we generated *Il11* reporter mice. IL-11<sup>+</sup> cells appeared in the colon of three murine  
47 tumor models, and a murine acute colitis model. *Il11ra1* or *Il11* deletion attenuated the  
48 development of colitis-associated colorectal cancer. IL-11<sup>+</sup> cells expressed fibroblast  
49 markers, and genes associated with cell proliferation and tissue repair. IL-11 induced  
50 STAT3 phosphorylation in colonic fibroblasts, suggesting the activation of IL-11<sup>+</sup>  
51 fibroblasts. Analysis using the human cancer database revealed that genes enriched in  
52 IL-11<sup>+</sup> fibroblasts were elevated in human colorectal cancer, and correlated with  
53 reduced disease-free survival. Together, our results suggested that tumor cells induced  
54 IL-11<sup>+</sup> fibroblasts, and that a feed-forward loop between IL-11 and IL-11<sup>+</sup> fibroblasts  
55 might contribute to tumor development.

56 (149 words)

57

58 **KEYWORDS:** cancer-associated fibroblasts, colitis, colitis-associated colorectal cancer,  
59 dextran sulfate sodium, inflammation-associated fibroblasts; interleukin-11, IL-11  
60 receptor, reporter mice, STAT3.  
61

62 **INTRODUCTION**

63 Maintenance of intestinal homeostasis involves a variety of cell types, including  
64 epithelial, immune, and stromal cells<sup>1,2,3</sup>. Within the intestinal lamina propria, stromal  
65 cells include fibroblasts,  $\alpha$  smooth muscle actin ( $\alpha$ SMA)-positive myofibroblasts,  
66 endothelial cells, and pericytes<sup>4,5</sup>. These stromal cells organize the tissue architecture,  
67 and have recently been revealed to play crucial roles in regulating immune responses,  
68 tissue repair, and tumor development<sup>3,4,5</sup>. Recent studies have focused on fibroblasts  
69 that can support tumor growth, termed cancer-associated fibroblasts (CAFs)<sup>6,7,8</sup>. In a  
70 very recent study, single-cell RNA-sequencing (scRNA-seq) was performed to analyze  
71 colon biopsies from healthy individuals and ulcerative colitis (UC) patients. The results  
72 revealed that UC patients' colon samples included a unique subset of fibroblasts, termed  
73 inflammation-associated fibroblasts (IAFs), with high expression of *IL11*, *IL24*,  
74 *IL13RA2*, and *TNFSFR11B*<sup>9</sup>. Another prior study demonstrated that CD10 and GPR77  
75 might be markers of CAFs that mediate chemotherapy resistance in human cancer  
76 through IL-6 and IL-8 production<sup>10</sup>. Combined these findings together, stromal  
77 fibroblasts play a crucial role in the development of cancer and colitis, the full picture of

78 fibroblast function and heterogeneity remains unclear.

79 Interleukin (IL)-11 is a member of the IL-6 family, and exhibits pleiotropic  
80 functions, including hematopoiesis, bone development, tissue repair, and tumor  
81 development<sup>11, 12</sup>. The IL-11 receptor comprises IL-11R $\alpha$ 1, which binds IL-11, and  
82 gp130, which transmits signals to the nucleus via Janus kinase (JAK) activation<sup>13</sup>. JAKs  
83 phosphorylate STAT3, and phosphorylated STAT3 enters the nucleus where it activates  
84 the transcription of various target genes associated with cell proliferation and apoptosis  
85 suppression<sup>14, 15, 16, 17</sup>. IL-11 production is regulated by several cytokines, including  
86 TGF $\beta$ , IL-1 $\beta$ , IL-17A, and IL-22<sup>18, 19, 20, 21</sup>. We previously demonstrated that IL-11  
87 production is induced by reactive oxygen species (ROS) and the electrophile  
88 1,2-naphthoquinone, which, in turn, promotes liver and intestine tissue repair<sup>22, 23</sup>.  
89 While IL-11 is reportedly produced in various cell types (including stromal,  
90 hematopoietic, and epithelial cells) in response to different stimuli<sup>16, 17, 24, 25</sup>, the cellular  
91 sources of IL-11 *in vivo* are not fully understood.

92 Colorectal cancers exhibit increased IL-11 expression in human and mice.

93 Moreover, deletion of the *Il11ral* gene attenuates colitis-associated colorectal cancer

94 (CAC) development in mice treated with azoxymethane (AOM) and dextran sulfate  
95 sodium (DSS), or in adenomatous polyps of mice harboring mutation of the  
96 *Adenomatous polyposis coli (Apc)* gene (*Apc<sup>Min/+</sup>*)<sup>17</sup>. On the other hand, *IL11* gene  
97 polymorphism is associated with increased ulcerative colitis (UC) susceptibility in  
98 human patients<sup>26</sup>. *IL11* expression is increased in patients with mild UC, but decreased  
99 in patients with severe UC<sup>27</sup>. These findings suggest that IL-11 may promote colorectal  
100 cancer development, but could also attenuate colitis under certain conditions. Moreover,  
101 recent studies report that IL-11 plays a crucial role in fibrosis development in various  
102 organs, including the lung, heart, liver, and kidney<sup>28,29</sup>.

103 In the present study, we aimed to characterize IL-11-producing cells *in vivo*. We  
104 generated *IL11-Enhanced green fluorescence protein (Egfp)* reporter mice, and detected  
105 IL-11<sup>+</sup> cells in the colonic tumor tissues of a CAC mouse model and in *Apc<sup>Min/+</sup>* mice.  
106 Deletion of *Il11ra* or *Il11* attenuated CAC development in mice. When tumor organoids  
107 were transplanted into the colon, IL-11<sup>+</sup> cells appeared in the tumor tissues. Moreover,  
108 IL-11<sup>+</sup> cells rapidly appeared in the colon of mice after DSS treatment. IL-11<sup>+</sup> cells  
109 expressed stroma cell markers and genes associated with cell proliferation and tissue



110 repair, suggestive of colonic fibroblasts. IL-11 induced robust STAT3 phosphorylation  
111 in colonic fibroblasts, but not in colonic epithelial organoids. Using the human cancer  
112 database, we found that the genes enriched in IL-11<sup>+</sup> fibroblasts were elevated in human  
113 colorectal cancer, and that high expression of several of these genes was correlated with  
114 reduced disease-free survival among CRC patients. Together, our present results  
115 demonstrated that tumor cells induced IL-11<sup>+</sup> fibroblasts, and that a feed-forward loop  
116 between IL-11 and IL-11<sup>+</sup> fibroblasts may contribute to tumor development.  
117

118 **RESULTS**

119 **Characterization of IL-11<sup>+</sup> Cells in CAC Using *Il11-Egfp* Reporter Mice**

120 To characterize IL-11-producing (IL-11<sup>+</sup>) cells *in vivo*, we generated transgenic mice in  
121 which *Egfp* expression was under control of the *Il11* gene promoter using a bacterial  
122 artificial chromosome (BAC) vector (Supplementary Fig. 1a). *Egfp* cDNA and a polyA  
123 signal were inserted in-frame in the second exon of the *Il11* gene (Supplementary Fig.  
124 1a). As expected, *Il11* mRNA expression was correlated with *Egfp* mRNA expression in  
125 various tissues (Supplementary Fig. 1b, c). Notably, *Il11* mRNA expression was highest  
126 in the testis, and was very low in other tissues in mice under normal conditions  
127 (Supplementary Fig. 1b).

128 Although *Il11* mRNA expression is elevated in colorectal cancer among mice  
129 and human<sup>16, 17</sup>, the origin of IL-11<sup>+</sup> cells remains controversial. We used the *Il11-Egfp*  
130 reporter mice to monitor the appearance of IL-11<sup>+</sup> cells in a CAC model. AOM  
131 administration followed by repeated exposure to DSS causes CAC development in  
132 mice<sup>30, 31, 32, 33</sup>. On day 77 after AOM/DSS administration, the *Il11-Egfp* reporter mice  
133 developed large tumors in the colon (Fig. 1a, b). At this time, we isolated tumor and

134 nontumor tissues, and examined the *Illi* mRNA expression by qPCR. *Illi* and *Egfp*  
135 mRNA expressions were elevated in tumor tissues compared to nontumor tissues from  
136 mice with AOM/DSS-induced CAC (Fig. 1c).

137 We next isolated and characterized IL-11<sup>+</sup> cells from tumors of *Illi-Egfp*  
138 reporter mice. We observed increased numbers of EGFP (IL-11)<sup>+</sup> cells in tumor tissues  
139 compared to nontumor tissues from the colon of AOM/DSS-treated *Illi-Egfp* reporter  
140 mice (Fig. 1d). While the majority of IL-11<sup>+</sup> cells expressed stroma cell markers, such  
141 as Thy1.2 and podoplanin, numerous IL-11<sup>+</sup> cells expressed CD45.2 or EpCAM (Fig.  
142 1e). Immunohistochemistry (IHC) revealed IL-11<sup>+</sup> cells in stroma tissues surrounding  
143 tumor cells (Fig. 1f). IL-11<sup>+</sup> cells also expressed vimentin, collagen I, and collagen IV,  
144 but not  $\alpha$ SMA (Supplementary Fig. 1d), suggesting that these cells were fibroblasts but  
145 not myofibroblasts. Notably, a few E-cadherin-positive tumor cells exhibited weak  
146 EGFP expression (Fig. 1g). Overall, these results suggest that the IL-11<sup>+</sup> cells  
147 constituted heterogenous cell populations, which might explain previous apparently  
148 inconsistent results showing that IL-11<sup>+</sup> cells were derived from hematopoietic,  
149 epithelial, or stromal cells<sup>17,24</sup>.

150 EGFP-positive cells were not detected in the colon of *Il11-Egfp* reporter mice  
151 before AOM/DSS treatment (data not shown), possibly suggesting that small numbers  
152 of resident IL-11<sup>+</sup> cells might proliferate and expand *in situ*. Alternatively, IL-11<sup>-</sup> cells  
153 could be converted into IL-11<sup>+</sup> cells after AOM/DSS treatment. To discriminate these  
154 two possibilities, we investigated whether IL-11<sup>+</sup> cells expressed the cell-proliferating  
155 antigen Ki67. The majority of IL-11<sup>+</sup> cells did not express Ki67 (Fig. 1h), supporting  
156 the possibility that IL-11<sup>+</sup> cells were derived from IL-11<sup>-</sup> cells during tumor  
157 development.

158

### 159 **Attenuated CAC Development in *Il11ra1*<sup>-/-</sup> and *Il11*<sup>-/-</sup> Mice**

160 A previous study reported attenuated CAC development in *Il11ra1*<sup>-/-</sup> mice<sup>17</sup>.  
161 Consistently, our present data confirmed the attenuation of AOM/DSS-induced CAC in  
162 *Il11ra1*<sup>-/-</sup> mice compared to wild-type mice (Supplementary Fig. 2a). To further  
163 substantiate that the IL-11/IL-11R-dependent signaling pathway contributed to CAC  
164 development, we investigated *Il11*<sup>-/-</sup> mice. As we previously reported<sup>34</sup>, *Il11*<sup>-/-</sup> mice  
165 showed no abnormalities. When wild-type and *Il11*<sup>-/-</sup> mice were treated with

166 AOM/DSS, we observed attenuated CAC development in *Il11*<sup>-/-</sup> mice compared to  
167 wild-type mice (Supplementary Fig. 2b). Moreover, reciprocal BM transfer  
168 experiments revealed that *Il11* expression in non-hematopoietic cells might be  
169 primarily responsible for the increased tumor numbers and tumor load in the colon  
170 (Supplementary Fig. 2c, d), although *Il11* expression in hematopoietic cells also partly  
171 contributed the increased tumor area in the colon (Supplementary Fig. 2c, d). We  
172 focused our subsequent analyses on IL-11<sup>+</sup> colonic fibroblasts, which are hereafter  
173 referred to as IL-11<sup>+</sup> colon cancer-associated fibroblasts (CAFs).

174

### 175 **IL-11<sup>+</sup> CAFs Appear in Tumor Tissues in the Absence of Inflammation**

176 The above-described results suggested that tumor cells may have educated the  
177 surrounding IL-11<sup>-</sup> cells to become IL-11<sup>+</sup> CAFs. An alternative possibility is that  
178 IL-11<sup>-</sup> cells might cell-autonomously become IL-11<sup>+</sup> CAFs within the setting of an  
179 inflammatory milieu triggered by DSS administration. To discriminate these  
180 possibilities, we used two different inflammation-independent murine tumor models:  
181 adenomatous polyps in *Apc*<sup>Min/+</sup> mice<sup>33</sup> and transplantation of tumor organoids into

182 wild-type mice. In *Apc*<sup>Min/+</sup> mice, *Il11* and *Egfp* mRNA expression levels were elevated  
183 in colon tumors compared to nontumor tissues (Fig. 2a), and IL-11<sup>+</sup> CAFs appeared in  
184 stroma tissues surrounding tumor cells in the colon (Fig. 2b). Consistent with the results  
185 of IHC, we found increased numbers of IL-11<sup>+</sup> CAFs in the tumor tissues compared to  
186 non-tumor tissues from the colon of *Apc*<sup>Min/+</sup> mice (Fig. 2c). Moreover, most IL-11<sup>+</sup>  
187 CAFs expressed podoplanin and Thy1.2, and small numbers of IL-11<sup>+</sup> cells expressed  
188 hematopoietic and epithelial cell markers (Fig. 2d). Again, we observed weak EGFP  
189 expression in some E-cadherin-positive tumor cells themselves (Fig. 2e). Notably, most  
190 IL-11<sup>+</sup> CAFs were not Ki67<sup>+</sup> (Fig. 2f). IL-11<sup>+</sup> CAFs expressed vimentin, collagen I, and  
191 collagen IV, but not  $\alpha$ SMA (Fig. 2g).

192 We previously generated tumor organoids from the intestines of AKTP mice,  
193 which exhibit mutations of *Apc*, *Kras*, *Tgfb2*, and *Tp53* in intestinal epithelial cells<sup>35</sup>.  
194 These tumor organoids were transferred into the colon of *Il11-Egfp* reporter mice, and  
195 we examined whether IL-11<sup>+</sup> CAFs appeared along with tumor development  
196 (Supplementary Fig. 3a). On day 30 post-transplantation, the tumor organoids had  
197 developed into large tumors in the colon and, importantly, IL-11<sup>+</sup> CAFs appeared in the

198 tumor tissues (Figure Supplementary Fig. 3b). Moreover, these IL-11<sup>+</sup> CAFs expressed  
199 podoplanin and vimentin, but not CD45 or E-cadherin (Supplementary Fig. 3c).  
200 Together, these results strongly support that tumor cells instructed IL-11<sup>-</sup> cells to  
201 become IL-11<sup>+</sup> CAFs in the absence of inflammation.

202

### 203 **IL-11<sup>+</sup> Cells Appear in the Colon of DSS-Treated Mice and Express Stromal Cell**

#### 204 **Marker**

205 To test whether inflammation alone induced IL-11<sup>+</sup> cell development, we treated  
206 *Il11-Egfp* reporter mice with only DSS. *Il11* and *Egfp* expressions were very low in the  
207 colon of untreated *Il11-Egfp* reporter mice, and were elevated in the colon of *Il11-Egfp*  
208 reporter mice on day 7 after DSS treatment (Fig. 3a). IHC revealed that on day 6 after  
209 DSS treatment, large numbers of IL-11<sup>+</sup> cells appeared in the subepithelial tissues,  
210 where intestinal epithelial cells were detached due to severe inflammation (Fig. 3b).  
211 Moreover, we detected the rapid appearance of IL-11<sup>+</sup> cells just one day after DSS  
212 treatment (Fig. 3c). For a more detailed comparison of the phenotypes of IL-11<sup>+</sup> CAFs  
213 in tumor tissues and the IL-11<sup>+</sup> cells that appeared in colitis, we used flow cytometry to

214 analyze the expressions of various cell surface markers. After DSS treatment, we  
215 observed increased numbers of IL-11<sup>+</sup> cells in the colon (Fig. 3d). These IL-11<sup>+</sup> cells  
216 expressed stroma cell markers, including Thy1.2, podoplanin, CD29, PDGFR- $\alpha$ ,  
217 ICAM-1, VCAM-1, and Sca-1, but not CD45.2, EpCAM, CD31, or Ter119 (Fig. 3e).  
218 IL-11<sup>+</sup> cells were also positive for vimentin, collagen I, and collagen IV, but not  $\alpha$ SMA  
219 (Fig. 3f), suggesting that these cells were fibroblasts, but not myofibroblasts. Moreover,  
220 these IL-11<sup>+</sup> cells did not incorporate 5-bromo-2'-deoxyuridine (BrdU), a hallmark of  
221 cell proliferation, suggesting that they did not proliferate *in situ* (Fig. 3g). Together,  
222 these findings suggest that inflammation alone was sufficient to induce IL-11<sup>+</sup> cell  
223 development.

224

### 225 **IL-11<sup>+</sup> Cells Express Genes Associated with Cell Proliferation and Tissue Repair**

226 To further characterize the IL-11<sup>+</sup> cells that appeared in colitis, we used a cell sorter to  
227 isolate IL-11<sup>+</sup> cells as EGFP<sup>+</sup> cells from the colon of DSS-treated *Il11-Egfp* reporter  
228 mice. These sorted EGFP<sup>+</sup> cells were subjected to transcriptome analysis, and their gene  
229 expression profiles were compared with those of EGFP<sup>-</sup> cells. Heat-map analysis



230 revealed different gene expression patterns in these two populations (Fig. 4a). A volcano  
231 plot showed significantly elevated expressions of several genes, including *Il11*, *Mmp3*,  
232 and *Timp1*, in IL-11<sup>+</sup> cells compared to IL-11<sup>-</sup> cells (Fig. 4b). Gene Ontology (GO)  
233 enrichment analysis revealed that EGFP<sup>+</sup> cells exhibited enriched expressions of genes  
234 associated with cell proliferation, organ morphogenesis, angiogenesis, and wound  
235 healing (Fig. 4c). qPCR confirmed that IL-11<sup>+</sup> cells showed elevated levels of cytokines  
236 (*Il6* and *Il11*), chemokines (*Ccl2* and *Ccl11*), and genes associated with organ  
237 development (*Hgf* and *Tnfsf11*) (Fig. 4d). We also detected elevated expression levels of  
238 genes associated with colorectal cancer susceptibility loci (e.g., *Grem*, *Bmp2*, and  
239 *Bmp4*) and tumor development and invasion (e.g., *Wnt5a*, *Ereg*, *Mmp3*, *Mmp13*, and  
240 *Timp1*) (Figure 4D).

241 Of note, two unique subsets of fibroblasts termed inflammation-associated  
242 fibroblasts (IAFs)<sup>9</sup> and cancer-associated fibroblasts (CAFs) with mediating  
243 chemotherapy resistance<sup>10</sup> have been recently reported in ulcerative colitis (UC)  
244 patients and chemotherapy-resistant cancer patients, respectively. To investigate the  
245 relationship between IL-11<sup>+</sup> fibroblasts and IAFs or CAFs with mediating

246 chemotherapy resistance, we examined their hallmark gene expressions. We found  
247 elevated expressions of *Il13ra2* and *Tnfrsf11b* (markers of IAFs), but not *Cd10* or  
248 *Gpr77* (markers of CAFs with mediating chemotherapy resistance) in IL-11<sup>+</sup> cells  
249 compared to IL-11<sup>-</sup> cells (Fig. 4e). These findings indicated that the IL-11<sup>+</sup> cells  
250 appearing in the colon of DSS-treated mice were phenotypically similar to the IAFs  
251 observed in UC patients, but not CD10<sup>+</sup>GPR77<sup>+</sup> CAFs. Thus, these cells were referred  
252 to as IL-11<sup>+</sup> IAFs.

253 We next examined whether the gene expression profiles were similar between  
254 IL-11<sup>+</sup> IAFs and IL-11<sup>+</sup> CAFs. The genes enriched in IL-11<sup>+</sup> IAFs, including *Ccl2*,  
255 *Osmr*, *Wnt5a*, *Ereg*, *Mmp13*, *Timp1*, and *Tnfrsf11b*, were also elevated in  
256 AOM/DSS-induced tumor tissues (Supplementary Fig. 4). Although we did not examine  
257 the gene expression profiles of IL-11<sup>+</sup> CAFs from tumor tissues, our findings suggest  
258 that IL-11<sup>+</sup> IAFs may be phenotypically similar to IL-11<sup>+</sup> CAFs.

259

## 260 **The MEK/ERK Pathway is Involved in *Il11* Upregulation in Tumor Tissues**

261 Since IL-11<sup>+</sup> CAFs might promote tumor development, it is crucial to investigate the

262 mechanisms by which inflammation or tumor cells induce IL-11 expression. We  
263 previously reported that oxidative stress induces *Il11* mRNA expression in an  
264 ERK/Fra-1-dependent manner<sup>22, 23</sup>. Thus, we tested whether DSS treatment induced  
265 oxidative stress in the colon. We observed enhanced oxidative stress in colonic cells  
266 after DSS treatment, and found that an antioxidant, N-acetyl cysteine (NAC)  
267 administration attenuated this DSS-induced oxidative stress (Fig. 5a). Additionally,  
268 DSS-induced oxidative stress was ameliorated by administration of antibiotics (Abx)  
269 (Fig. 5b), suggesting that bacterial infection induces oxidative stress. Consistent with  
270 these findings, both an antioxidant, NAC and Abx blocked the DSS-induced  
271 upregulation of *Il11* mRNA (Fig. 5c, d). Furthermore, DSS induced ERK  
272 phosphorylation, which was blocked by administration of the MEK inhibitor trametinib  
273 or NAC, accompanied by downregulation of *Il11* expression (Fig. 5e–g). These results  
274 indicated that oxidative stress-dependent ERK activation might contribute to *Il11*  
275 expression in the colon. Although several studies report that TGF $\beta$  induces IL-11  
276 production in various cells<sup>20, 21</sup>, we found that neutralization of TGF $\beta$  signals using  
277 anti-TGF $\beta$  antibody did not block *Il11* expression in the colon after DSS treatment (Fig.

278 5h, i).

279 We next investigated whether *Il11* expression was induced in the tumor  
280 microenvironment in a manner similar to those in DSS-induced colitis. Administration  
281 of trametinib, but not Abx, NAC, or neutralizing antibody against TGF $\beta$ , decreased *Il11*  
282 expression in CAC after AOM/DSS treatment (Fig. 5j–o). Moreover, we observed a  
283 similar inhibitory effect of Trametinib, but not Abx, NAC, or neutralizing antibody  
284 against TGF $\beta$  in colon tumors in *Apc<sup>min/+</sup>* mice (Supplementary Fig. 5a–f). Together,  
285 these results suggested that *Il11* expression was induced in a MEK/ERK-dependent  
286 manner, although the upstream signals that induce activation of the MEK/ERK pathway  
287 could differ between cases of inflammation versus tumors. Of note, induction of *Il11* in  
288 the colon might be independent of TGF $\beta$  in the tumor microenvironment at least under  
289 our experimental conditions.

290

### 291 **IL-11 Preferentially Induces Signals to Fibroblasts**

292 Previous studies report that IL-11 induces signals in colonic epithelial cells and  
293 fibroblasts<sup>17, 29</sup>. To determine which cells were the primary targets of IL-11, we

294 examined the *Il1ral* expression on colonic fibroblasts and normal colonic epithelial  
295 organoids. Since IL-22 induces signals in intestinal epithelial cells<sup>36</sup>, we also examined  
296 the IL-22 receptor expression on both cell types. Colonic epithelial organoids showed  
297 high expression of *Il22r*, but not *Il1ral*, while colonic fibroblasts exhibited high  
298 expression of *Il1ral*, but not *Il22ra1* (Fig. 6a). Consistently, robust STAT3  
299 phosphorylation in colonic fibroblasts was induced by IL-11, but not IL-22 (Fig. 6b). To  
300 further characterize IL-11-inducible genes *in vivo*, we injected IL-11R agonist into  
301 wild-type mice<sup>22</sup>, which induced upregulation of many genes in the colon (Fig. 6c–e),  
302 some of which were enriched in IL-11<sup>+</sup> IAFs (Fig. 6e). We performed qPCR to verify  
303 the induction of these genes (including *Hgf*, *Osmr*, *Rspo3*, *Mmp3*, *Timp1*, and *Pdpr*) in  
304 the colon after injection of IL-11R agonist (Supplementary Fig. 6). It is likely that IL-11  
305 released from colonic fibroblasts might activate IL-11<sup>+</sup> IAFs or CAFs in an autocrine or  
306 paracrine manner. Overall, our findings suggested that expression of IL-11-stimulated  
307 genes in IL-11<sup>+</sup> CAFs might further modulate the tumor microenvironment.

308

309 **Genes Enriched in IL-11<sup>+</sup> IAFs Show Elevated Expression in Human Colorectal**

310 **Cancer**

311 Assuming that the appearance of IL-11<sup>+</sup> CAFs was correlated with CAC development in  
312 mice (Fig. 1, 2), we hypothesized that the genes enriched in IL-11<sup>+</sup> IAFs might also be  
313 elevated in human colorectal cancer. We focused on genes with over two-fold greater  
314 expression in IL-11<sup>+</sup> IAFs compared to IL-11<sup>-</sup> cells (Fig. 4), and extracted 17 genes  
315 matching our criteria from the human cancer database (GSE33133). Intriguingly,  
316 subsets of genes elevated in IL-11<sup>+</sup> IAFs, including *HGF*, *TNFSF11*, *MMP3*, *MMP13*,  
317 and *TIMP1*, were significantly upregulated in colon cancer tissues compared to normal  
318 mucosa (Supplementary Fig. 7a).

319 Since many of the genes enriched in IL-11<sup>+</sup> IAFs were also upregulated in tumor  
320 tissues (Fig. 4d, e, Supplementary Fig. 7a), we hypothesized that the genes elevated in  
321 IL-11<sup>+</sup> IAFs, along with *IL11*, might critically affect the prognosis of cancer patients.  
322 Thus, we compared disease-free survival of colorectal cancer patients according to the  
323 expression levels of genes enriched in IL-11<sup>+</sup> IAFs. We found that reduced disease-free  
324 survival time was associated with higher expression of *IL6*, *MMP13*, and *TIMP1*, but  
325 not of *IL6/IL6R*, *IL11*, or *IL11/IL11R* (Supplementary Fig. 7b). Notably, higher

326 expression of *IL6/IL6R/IL11/IL11R/GP130* was associated with significantly diminished  
327 disease-free survival time. These results suggested that prognosis of human colorectal  
328 cancer patients may be critically determined by IL-11<sup>+</sup> IAFs and, possibly, by IL-11<sup>+</sup>  
329 CAFs, but not by IL-11.

330

### 331 **IL-11 Expression is Correlated with Progression of Human Cancers**

332 To characterize IL-11<sup>+</sup> cells in human colon tumor samples, we performed staining with  
333 anti-human IL-11 antibody. First, we verified that anti-human IL-11 antibody detected  
334 endogenous IL-11, using lysates of the human breast cancer cell line MDA-MB-231, in  
335 the absence or presence of siRNA against human *IL11* (Fig. 7a). IL-11<sup>+</sup> cells were  
336 scarcely detected in normal colonic tissues, but were numerous in adenomas and in  
337 early and advanced colorectal cancer tissues (Fig. 7b). Intriguingly, the relative area of  
338 IL-11<sup>+</sup> cells and the IL-11 signaling intensity were increased in advanced colon cancers  
339 compared to normal tissues (Fig. 7c, d). Moreover, positive staining for IL-11 was  
340 observed in vimentin-positive stromal cells, E-cadherin-positive tumor cells, and  
341 CD45-positive hematopoietic cells (Fig. 7e). Thus, IL-11<sup>+</sup> cells comprised

342 heterogeneous cell populations in the tumor microenvironment, although the majority  
343 were fibroblasts.



344 **DISCUSSION**

345 In the present study, we generated *Il11-Egfp* reporter mice to characterize IL-11<sup>+</sup> CAFs  
346 or IL-11<sup>+</sup> IAFs in different murine tumor and colitis models. We found that IL-11<sup>+</sup> cells  
347 in tumor tissues constituted heterogenous cell populations, including stromal, epithelial,  
348 and hematopoietic cells, and that *Il11ra*<sup>-/-</sup> or *Il11*<sup>-/-</sup> deletion attenuated CAC  
349 development in mice. Reciprocal BM transfer experiments revealed that stromal cells  
350 critically contributed to tumor progression; thus, we focused on IL-11<sup>+</sup> CAFs. IL-11  
351 activated IL-11<sup>+</sup> colonic fibroblasts. Transcriptome analysis showed that IL-11<sup>+</sup> IAFs  
352 expressed genes associated with tissue repair and cell proliferation. Moreover, some of  
353 the genes enriched in IL-11<sup>+</sup> IAFs were elevated in human colorectal cancer tissues, and  
354 their high expression was associated with poor prognosis of human colorectal cancer.  
355 Thus, our results suggest that a feed-forward loop between IL-11 and IL-11<sup>+</sup> CAFs may  
356 contribute to tumor development.

357 The newly developed *Il11-Egfp* reporter mice enabled us to characterize the  
358 IL-11<sup>+</sup> IAFs and CAFs that appeared in mouse models of colitis and CAC, respectively.  
359 In the colitis model, IL-11<sup>+</sup> IAFs exclusively expressed stromal cell markers, such as

360 Thy1 and podoplanin. A recent scRNA-seq analysis of colon biopsies from healthy  
361 individual and UC patients revealed that colon samples from UC patients exhibited a  
362 unique subset of fibroblasts, termed IAFs, that express *IL11*, *IL24*, *IL13RA2*, and  
363 *TNFSFR11B*<sup>9</sup>. Here we found elevated expression of these genes in IL-11<sup>+</sup> IAFs  
364 compared to IL-11<sup>-</sup> cells. Thus, IL-11 is a hallmark of IAFs. Since IL-11<sup>+</sup> IAFs  
365 expressed genes associated with cell proliferation and tissue repair, IL-11<sup>+</sup> IAFs might  
366 contribute to colitis attenuation in human UC patients.

367 In contrast to in DSS-induced colitis, in tumor tissues, we detected numerous  
368 IL-11<sup>+</sup> cells expressing epithelial or hematopoietic cell markers, including EpCAM or  
369 CD45.2. Consistently, previous studies report that IL-11<sup>+</sup> cells are derived from stromal,  
370 epithelial, or hematopoietic cells<sup>17,24</sup>. Our present results revealed that IL-11<sup>+</sup>, EpCAM<sup>+</sup>,  
371 and E-cadherin<sup>+</sup> epithelial cells might be tumor cells themselves, whereas we did not  
372 fully investigate the nature and origin of CD45.2<sup>+</sup> cells. Future scRNA-seq analysis of  
373 IL-11<sup>+</sup> cells will further elucidate the origin and characterization of heterogeneous  
374 populations of IL-11<sup>+</sup> cells in the tumor microenvironment.

375 Tumors cells may support tumor growth by educating the surrounding

376 fibroblasts, which are referred to as CAFs<sup>8, 37, 38</sup>. On the other hand, a recent study  
377 reported that surface expression of CD10 and GPR77 may be markers of CAFs that  
378 mediate chemotherapy resistance in human cancer through IL-6 and IL-8 production<sup>10</sup>.  
379 CD10 and GPR77 expression were not elevated in IL-11<sup>+</sup> IAFs or CAC in mice,  
380 suggesting that IL-11<sup>+</sup> IAFs and possibly IL-11<sup>+</sup> CAFs might be different from human  
381 CD10<sup>+</sup>GPR77<sup>+</sup> CAFs.

382 Elucidation of the mechanisms underlying IL-11 production by stromal cells in  
383 the tumor microenvironment may be crucial for understanding how tumor cells instruct  
384 stromal cells. Previous studies demonstrate that TGF $\beta$  induces IL-11 upregulation in  
385 various cell types<sup>20, 21</sup>. Indeed, we found that TGF $\beta$  stimulation induced IL-11  
386 production by colonic fibroblasts. Moreover, in murine xenograft models, human tumor  
387 cell lines that ectopically express human TGF $\beta$ 1 can elicit IL-11<sup>+</sup> CAFs<sup>24</sup>. However, in  
388 our present study, anti-TGF $\beta$  antibody treatment did not downregulate *Il11* expression  
389 in colonic adenomas of *Apc*<sup>min/+</sup> mice, or in AOM/DSS-induced CAC. Furthermore,  
390 culture supernatants of tumor organoids did not induce upregulated *Il11* expression by  
391 colonic fibroblasts in the absence or presence of anti-TGF $\beta$  antibody. Overall, although

392 TGF $\beta$  *per se* was able to induce IL-11 production, TGF $\beta$  may not be involved in the  
393 induction of IL-11<sup>+</sup> CAFs in the tumor microenvironment, at least under our  
394 experimental conditions. On the other hand, blockade of the ERK pathway attenuated  
395 *Ill1* expression in the colon of mice after DSS treatment, in colon adenomas of *Apc*<sup>min/+</sup>  
396 mice, and in AOM/DSS-induced CAC in mice. Thus, the signaling pathway(s) leading  
397 to MEK/ERK activation might be critically involved in IL-11 production. Further  
398 investigations are needed to address this subject.

399       Previous studies show that IL-11 and IL-22 induce proliferation and cell survival  
400 of colonic epithelial cells through STAT3 activation<sup>15, 36</sup>. Indeed, under our  
401 experimental conditions in colonic epithelial organoids, IL-22 induced strong STAT3  
402 phosphorylation, whereas IL-11 induced only weak STAT3 phosphorylation. In sharp  
403 contrast, IL-11 induced robust phosphorylation of STAT3 in colonic fibroblasts. Thus, it  
404 appears that colonic fibroblasts produced IL-11 in response to factors from tumor cells,  
405 which, in turn, activated and induced STAT3 phosphorylation in colonic fibroblasts in  
406 an autocrine or paracrine manner. This feed-forward loop between IL-11 and IL-11<sup>+</sup>  
407 CAFs might contribute to tumor development.

408 CAC development was attenuated in *Il1ra1<sup>-/-</sup>* and *Il11<sup>-/-</sup>* mice treated with  
409 AOM/DSS, but deletion of these genes did not dramatically affect tumor development  
410 compared to in a previous study<sup>17</sup>. The reason for these discrepancies is currently  
411 unknown. However, it is possible that the genetic background of the mice (C57/BL6 vs.  
412 129/C57/BL6 mixed background) might affect the tumor cells' dependence on IL-11  
413 signaling. On the other hand, our transcriptome analysis revealed that IL-11<sup>+</sup> CAFs  
414 expressed various genes associated with tissue repair and cell proliferation. Indeed, we  
415 found that high expression of the genes enriched in IL-11<sup>+</sup> IAFs (including *IL6*, *MMP3*,  
416 and *TIMP1*, but not *IL11* itself) was associated with reduced disease-free survival of  
417 CRC patients. Thus, it would be interesting to investigate whether depletion of IL-11<sup>+</sup>  
418 CAFs might have profound effects on colorectal cancer progression.  
419

420 **METHODS**

421 **Reagents**

422 Recombinant mouse IL-11 (R&D), IL-22 (Biolegend), mouse TGF $\beta$ 1 (Biolegend),  
423 N-acetyl cysteine (NAC) (Nakalai), and Trametinib (LC Laboratories) were purchased  
424 from the indicated sources. The following antibodies used in this study were obtained  
425 from the indicated sources: anti-phospho-ERK (4370, CST), anti-Ki67 (ab16667,  
426 Abcam), anti-GFP (GFP-Go-Af1480 or GFP-Rb-Af2020, Frontier Institute), anti-BrdU  
427 (BU1/75, BIO-RAD), anti-IL-11 (LS-C408373, LSBio), anti-CD45 (13917, CST),  
428 anti-CD45 (IR751, Dako), anti-podoplanin (127403, BioLegend), anti- $\alpha$ -SMA (ab5694,  
429 Abcam), anti-collagen I (ab34710, Abcam), anti-collagen IV (ab6586, Abcam),  
430 anti-E-cadherin (560062, BD Biosciences), anti-E-cadherin (NCH-38, Dako),  
431 anti-vimentin (9856, CST), anti-phospho-STAT3 (9145, CST), anti-STAT3 (SC-482,  
432 Santa Cruz), anti- $\beta$ -Actin (622102, Biolegend), and anti-tubulin (T5168,  
433 Sigma-Aldrich). Anti-horseradish peroxidase (HRP) -conjugated anti-rabbit IgG  
434 (NA934), HRP-conjugated anti-rat IgG (NA935), and HRP-conjugated anti-mouse IgG  
435 (NA931) antibodies were from GE Healthcare. Alexa Fluor 488-conjugated donkey  
436 anti-rabbit IgG (A21206), Alexa Fluor 594-conjugated donkey anti-rabbit IgG

437 (A21207), Alexa Fluor Plus 594-conjugated donkey anti-rabbit IgG (A32754), Alexa  
438 Fluor 647-conjugated donkey anti-rabbit IgG (A31573), Alexa Fluor 594-conjugated  
439 donkey anti-mouse IgG (A21203), and Alexa Fluor 488-conjugated donkey anti-goat  
440 IgG (A11055) antibodies, and Alexa Fluor 594-conjugated streptavidin (S11227) were  
441 purchased from Invitrogen.

442 Unless otherwise indicated, the following antibodies used for flow cytometry  
443 were obtained from TONBO Biosciences; anti-CD11b (20-0112, clone M1/70),  
444 anti-CD16/CD32-mAb (2.4G2) (made in house), anti-CD24a (Biolegend, 101813, clone  
445 M1/69), anti-CD31 (eBioscience, 17-0311-82, clone 390), anti-CD34 (eBioscience,  
446 13-0341-81, clone RAM34), anti-CD45.1 (35-0453, clone A20), anti-CD45.2 (20-0454,  
447 clone 104), anti-EpCAM (BioLegend, 118214, clone G8.8), anti-Thy1.2 (20-0903,  
448 clone 30-H12), anti-podoplanin (BioLegend, 127414, clone 8.1.1), anti-TER-119  
449 (BioLegend, 116212, clone TER-119), anti-MHC Class II (Miltenyi Biotec,  
450 130-102-139, clone M5/114.15.2), anti-ICAM-1 (BD Biosciences, 561605, clone 3E2),  
451 anti-VCAM-1 (BioLegend, 105718, clone 429), anti-Sca-1 (BioLegend, 122512, clone

452 E13161.7), anti-Lyve1 (eBioscience, 50-0443-80, clone ALY7), anti-PDGFR $\alpha$   
453 (eBioscience, 17-1401-81, clone APA5), and Streptavidin APC (eBioscience).

454 The hybridoma cell line (1D11)<sup>39</sup> that produces neutralizing antibody against  
455 all TGF $\beta$  isoforms ( $\beta$ 1,  $\beta$ 2, and  $\beta$ 3) was purchased from ATCC, and anti-TGF $\beta$   
456 antibody was produced in house. Control mouse IgG was purchased from  
457 Sigma-Aldrich (I5381).

458

#### 459 **Mice**

460 *Il11<sup>-/-</sup>* mice (generated in our lab) and *Il11ra1<sup>-/-</sup>* mice (provided by L. Robb) were  
461 previously described<sup>34 40</sup>. *Apc<sup>min/+</sup>* (002020) were purchased from Jackson Lab.  
462 C57BL/6 (CD45.2<sup>+</sup>) and C57BL/6-SJL (CD45.1<sup>+</sup>) mice were purchased from  
463 Japan-SLC.

464 Mice in different cages or derived from different sources were cohoused for 2  
465 weeks for normalization of the microbiota composition before experiments. All animals  
466 were housed and maintained under specific pathogen-free conditions in the animal  
467 facility at Juntendo University School of Medicine or Toho University School of



468 Medicine. All experiments were performed according to the guidelines approved by the  
469 Institutional Animal Experiment Committee of Juntendo University School of Medicine  
470 or Toho University School of Medicine (19-51-414, 19-51-411).

471

#### 472 **Generation of *Il11-Egfp* reporter mice**

473 The *Egfp* reporter gene was introduced into the BAC clone (RP23-285B12) by two-step  
474 Red/ET recombineering technology according to the manufacturer's protocol (Gene  
475 Bridges). In the first step, a *rpsL-neo* cassette included in the kit was amplified by PCR

476 using a primer set (*Il11*-ET1-F2:

477 ACTCCCTCAGACCCAGAGTTTGGCCTGATTCTCCCTTCTGTCCACAGGTGG

478 CCTGGTGATGATGGCGGGATCG and *Il11*-ET1-R2:

479 ACGACTCTATCTGGCCAGAGGCTCAGCACCACCAGGACCAGGCGACAAACT

480 CAGAAGAACTCGTCAAGAAGGCG) and inserted into the target region of the BAC

481 clone. In a second step, the *rpsL-neo* cassette in the modified BAC clone was replaced

482 with *Egfp-polyA* cassette which was amplified from *Egfp*-expression vector (pAWZ)

483 using a primer set (*Il11*-ET2-F2:

484 ACTCCCTCAGACCCAGAGTTTGGCCTGATTCTCCCTTCTGTCCACAGGTATG

485 GTGAGCAAGGGCGAG and *Il11-ET2-R2*:

486 ACGACTCTATCTGGCCAGAGGCTCAGCACACCAGGACCAGGCGACAAACct

487 CTAGTGGATCATTAACGCTTAC). A resultant clone designated as *Il11-Egfp* was

488 verified by restriction digestion of BAC DNA and by sequencing.

489 Intracytoplasmic sperm injection (ICSI) was performed as previously

490 described with slightly modifications<sup>41</sup>. The mixture of sperm and *Il11-Egfp* DNA was

491 diluted with HEPES-modified CZB containing 12% polyvinylpyrrolidone

492 (Sigma-Aldrich) before being used for ICSI. Injections were performed by

493 micromanipulators (Leica) with a PMM-150 FU piezo-impact drive unit (Prime Tech)

494 using a blunt-ended mercury-containing injection pipette. After discarding the midpiece

495 and tail, the head of spermatozoa was injected into an oocyte from C57/BL6 mice.

496 Oocytes matured into two-cell stage embryos at 24 hours after injection, and then

497 two-cell stage embryos were transferred to oviducts of pseudopregnant females.

498 Transgenic founders were backcrossed to C57/BL6J mice for several generations.

499 Among them, one line exhibited an intimate correlation of *Il11* and *Egfp* expressions

500 were selected and used for further experiments.

501

502 **Induction of DSS-induced colitis and colitis-associated cancer (CAC) in mice**

503 Nine- to fifteen-week-old wild-type or *Il11-Egfp* reporter mice received 1.5 % DSS

504 (MW: 36,000-50,000 D; MP Biomedicals) *ad libitum* in drinking water for 5 days,

505 which then was changed to regular water. To reduce gut commensal microflora, mice

506 received mixtures of antibiotics in drinking water containing ampicillin (1 g/L,

507 Sigma-Aldrich), kanamycin (0.4 g/L, Sigma-Aldrich), gentamicin (0.035 g/L,

508 Sigma-Aldrich), metronidazole (0.215 g/L, Sigma-Aldrich), vancomycin (0.18 g/L,

509 Sigma-Aldrich), and colistin (0.042 g/L, Sigma-Aldrich). Administration of antibiotics

510 into mice started at 4 weeks before DSS treatment and continued during DSS treatment.

511 To attenuate oxidative stress in DSS-treated mice, mice received NAC (10 g/L) along

512 with DSS in drinking water for 5 days. To neutralize TGF $\beta$  in DSS-treated mice, mice

513 were intraperitoneally injected with anti-TGF $\beta$  antibody (1D11) or control mouse IgGs

514 (5 mg/kg) on day 2 and day 4 after DSS treatment. To inhibit ERK activation in

515 DSS-treated mice, a MEK inhibitor, Trametinib (2 mg/kg) was administered into mice

516 by gavage at 30 and 6 hours before the start of DSS treatment at a fine suspension in  
517 0.5% Hydroxypropyl Cellulose (Alfa Aesar) and 0.2 % Tween-80.

518 To induced CAC, 9- to 15-week-old mice were intraperitoneally injected with  
519 10 mg/kg AOM (Sigma-Aldrich). One week later, mice received 1.5 % DSS *ad libitum*  
520 in drinking water for 5 days, followed by 2 weeks of regular water, and this was  
521 repeated for two additional cycles. To reduce numbers of commensal bacteria and  
522 oxidative stress in AOM/DSS-treated mice or *Apc<sup>min/+</sup>* mice, we administered mixtures  
523 of antibiotics and NAC into the indicated mice for the last 8 weeks and 4 weeks just  
524 before sacrifice, respectively. Trametinib (2mg/kg) (-6 and -30 hours) or anti-TGF $\beta$   
525 antibody (5 mg/kg) (on day -1, -3, -5) were administered into AOM/DSS-treated mice  
526 or *Apc<sup>min/+</sup>* mice at the indicated days just before sacrifice.

527

### 528 **Flow cytometry**

529 To isolate IL-11<sup>+</sup> cells, the colon was removed from DSS-treated *Il11-Egfp* reporter  
530 mice. Then, the colon was minced with scissors and digested in RPMI 1640 containing  
531 100 U/mL Penicillin and 100  $\mu$ g/mL Streptomycin, 1mg/mL Collagenase (Wako), 50

532  $\mu\text{g/mL}$  DNase (Roche), 0.5 mg/mL Dispase (Roche), and 2% (v/v) fetal bovine serum  
533 (FBS, Gibco) for 60 min. Single cell suspensions were prepared, and cells were stained  
534 with the indicated antibodies and analyzed by LSRFortessa X-20 (BD Biosciences) or  
535 BD Verse (BD Biosciences). Data were processed by FlowJo software (FlowJo). To  
536 further characterize IL-11<sup>+</sup> cells, EGFP<sup>+</sup> cells were sorted by MoFlo Astrios cell sorter  
537 (Beckman Coulter) and subjected to microarray analysis.

538           To isolate IL-11<sup>+</sup> cells from tumors in the colon of *Il11-Egfp* reporter mice  
539 treated with AOM/DSS or *Apc<sup>min/+</sup>;Il11-Egfp* mice, tumor tissues were removed from  
540 non-tumor tissues. Then, single cell suspension from tumor tissues was prepared as  
541 described above. Cells were stained with the indicated antibodies and expression of  
542 various cell surface markers on GFP<sup>+</sup> cells were analyzed by flow cytometry.

543

#### 544 **Generation of bone marrow chimeras**

545 After BM cells were prepared from *Il11<sup>+/+</sup>* or *Il11<sup>-/-</sup>* mice (CD45.2), 3-5 x 10<sup>6</sup> BM cells  
546 were transferred to 8-week-old recipient mice [C57BL/6-SJL mice (CD45.1)] that had  
547 been exposed to lethal irradiation (9.0 Gray). In reciprocal BM transfer experiments,

548 BM cells from wild-type C57BL/6-SJL mice (CD45.1) were transferred to *Il11*<sup>+/+</sup> or  
549 *Il11*<sup>-/-</sup> mice (CD45.2) that had been exposed to lethal irradiation (9.0 Gray). At 2 to 3  
550 months after transfer, peripheral blood mononuclear cells were collected and stained  
551 with FITC-conjugated anti-CD45.1 and allophycocyanin (APC)-conjugated  
552 anti-CD45.2 antibodies. The chimerism of bone marrow cells was calculated by  
553 counting numbers of CD45.1<sup>+</sup> and CD45.2<sup>+</sup> by flow cytometry. Average chimerisms  
554 were more than 90 %.

555

#### 556 **Quantitative PCR (qPCR) Assays**

557 Total RNAs were extracted from the indicated tissues of mice by using TRI Reagent  
558 (Molecular Research Center) or Sepasol II Super (Nacalai Tesque), and cDNAs were  
559 synthesized with the RevertraAce qPCR RT Kit (Toyobo). To remove residual DSS,  
560 mRNAs prepared from the colon of mice treated with DSS were further purified by  
561 LiCl precipitation as described previously<sup>42</sup>. Quantitative polymerase chain reaction  
562 (qPCR) analysis was performed with the 7500 Real-Time PCR detection system with  
563 CYBR green method of the target genes together with murine *Hprt* an internal control

564 with 7500 SDS software (Thermo Fisher Scientific). The primers used in this study are  
565 shown in Table S1.

566

### 567 **Microarray analysis**

568 We compared gene expression profiles of RNAs from EGFP-positive and negative cells  
569 from the colon of *Il11-Egfp* reporter mice. EGFP<sup>+</sup> and EGFP<sup>-</sup> cells were sorted from the  
570 colon of *Il11-Egfp* mice (n = 3 mice) on day 7 after DSS administration, total RNAs  
571 were extracted using TRI-reagent according to the manufacturer's instructions  
572 (Molecular Research Center). Purified RNAs were subjected to a LiCl purification to  
573 remove residual DSS. cDNA was synthesized with the Ambion WT Expression Kit  
574 (Affymetrix) and labeled with GeneChip WT Terminal Labeling Kit (Affymetrix)  
575 according to the manufacturer's protocol. Affymetrix GeneChip Hybridization wash  
576 stain kit was used to hybridize samples to GeneChip Mouse Gene ST 1.0 ST Array  
577 (Affymetrix). Signals were scanned with the Genechip Scanner 3000 7G, and obtained  
578 data were analyzed with Affymetrix Expression Console software (Affymetrix). The  
579 gene expression was analyzed using GeneSpring (Silicon Genetics). Functional

580 enrichment analysis of differentially expressed genes from the data of microarray  
581 analysis was performed using DAVID Bioinformatics Resources<sup>43, 44</sup>. Data were  
582 deposited in NCBI as a GSE140411.

583           To identify target genes by IL-11 in the colon, we intravenously injected 10  
584  $\mu$ g of IL-11R agonist into wild-type mice (n=2-3 mice). Generation, purification, and  
585 characterization of IL-11R agonist were described previously<sup>22</sup>. Mice were sacrificed at  
586 3 hours after injection. Total RNAs were extracted from the colon of mice by using  
587 Sepasol II Super. Labeled cRNA were prepared from total RNA using the Agilent's  
588 Quick Amp Labeling Kit (Agilent). Following fragmentation, cRNA were hybridized to  
589 SurePrint G3 Mouse Gene Expression 8x60K (Agilent) according to the manufacturer's  
590 instruction. Raw data were extracted using the software provided by Agilent Feature  
591 Extraction Software (v11.0.1.1). The raw data for same gene was then summarized  
592 automatically in Agilent feature extraction protocol to generate raw data text file,  
593 providing expression data for each gene probed on the array. Array probes that have  
594 Flag A in samples were filtered out. Selected processed signal value was transformed by  
595 logarithm and normalized by quantile method. Statistical significance of the expression



596 data was determined using fold change and LPE test in which the null hypothesis was  
597 that no difference exists among 2 groups. Hierarchical cluster analysis was performed  
598 using complete linkage and Euclidean distance as a measure of similarity.  
599 Gene-Enrichment and Functional Annotation analysis for significant probe list was  
600 performed using Gene Ontology (<http://geneontology.org>). All data analysis and  
601 visualization of differentially expressed genes was conducted using R 3.0.2  
602 ([www.r-project.org](http://www.r-project.org)). Data were deposited in NCBI as a GEO accession number  
603 GSE141643.

604

#### 605 **Immunohistochemistry (IHC)**

606 Tissues were fixed in 10% formalin and embedded in paraffin blocks.  
607 Paraffin-embedded colonic sections were used for H&E staining, immunohistochemical,  
608 and immunofluorescence analyses. For immunohistochemistry, paraffin-embedded  
609 sections were treated with Instant Citrate Buffer Solution (RM-102C, LSI Medicine) or  
610 Target Retrieval Solution (S1699, Dako) as appropriate to retrieve antigen. Then tissue  
611 sections were stained with the indicated antibodies, followed by visualization of

612 Alexa-conjugated secondary antibodies, or biotin-conjugated secondary antibodies  
613 followed by Streptavidin-HRP (Vector Laboratories).

614 In human tumor samples, tissue sections were preincubated with MaxBlock™  
615 Autofluorescence Reducing Kit (MaxVision Biosciences) according to the  
616 manufacturer's instructions. After blocking, tissue sections were stained with the  
617 indicated antibodies as described above.

618 Pictures were obtained with an all-in-one microscope (BZ-X700, Keyence) or  
619 BX-63 (Olympus) and analyzed with BZ-X Analyzer (Keyence) or cellSens (Olympus)  
620 software. Confocal microscopy was performed on an LSM 880 (Zeiss) or A1R (Nikon).  
621 Images were processed and analyzed using the ZEN software (Zeiss) or the  
622 NIS-Elements (Nikon).

623

#### 624 **Histological scoring of severity of colitis**

625 Severity of colitis was evaluated by the following criteria, including infiltration of  
626 inflammatory cells and the degree of tissue damage as previously described<sup>45</sup>.

627 Infiltration of inflammatory cells; 0, the presence of rare inflammatory cells in the

628 colonic lamina propria; 1, increased numbers of inflammatory cells; 2, confluence of  
629 inflammatory cells; 3, extending of inflammatory cells into the submucosa and  
630 transmural extension of the inflammatory cell infiltrate. The degree of tissue damage; 0,  
631 absence of mucosal damage; 1, discrete focal lymphoepithelial lesions; 2, mucosal  
632 erosion and ulceration; 3, extensive mucosal damage and extension through deeper  
633 structure of the intestinal tract wall. Total severity scores ranging from 0 to 6 represent  
634 that 0 and 6 indicate no changes and extensive cell infiltration with tissue damage,  
635 respectively.

636

### 637 **Organoid Culture and transplantation of tumor organoids**

638 Mouse colon organoids were established from isolated crypts of wild-type mice as  
639 previously described with slight modification<sup>46</sup>. Obtained colonic organoids were  
640 cultured in Advanced DMEM/F12 (Thermo Fisher Scientific) containing 10 mM  
641 HEPES (Thermo Fisher Scientific), 1 x GlutaMAX (Thermo Fisher Scientific), 1 x B27  
642 (Thermo Fisher Scientific), N-acetyl cysteine (1  $\mu$ M), murine epidermal growth factor  
643 (50 ng/mL, Peprotech), murine Noggin (100 ng/mL, Peprotech), 0.5 mM A83-01

644 (Tocris), 3  $\mu$ M SB202190 (Sigma), 1  $\mu$ M nicotinamide (Sigma), Afamin and  
645 Wnt3A-condition medium (CM) (final concentration of 50%) which was provided by J.  
646 Takagi<sup>47</sup> and R-spondin 1-CM (final concentration of 10%) (Trevigen).

647 The small intestinal tumor organoids from  
648 *villin-CreER-Apc<sup>min/+</sup>-Kras<sup>+/LSL-G12D</sup>-Tgfb $\beta$ 2<sup>fllox/fllox</sup>-Tp53<sup>+/LSL-R270H</sup>* (AKTP) mice were  
649 described previously<sup>35</sup>. AKTP organoids were cultured in Advanced DMEM/F12  
650 containing 10 mM HEPES, 1 x GlutaMAX, 1 x B27, N-acetyl cysteine (1  $\mu$ M), murine  
651 epidermal growth factor (50 ng/mL), murine Noggin (100 ng/mL).

652 For transplantation, AKTP organoids were mechanically dissociated, and 3 x  
653 10<sup>5</sup> organoid cells mixed in Matrigel were injected into the subepithelial tissues of the  
654 rectum of *Il11-Egfp* reporter mice. At five weeks after transplantation, tumors were  
655 removed and subjected to histological analysis.

656

### 657 **Isolation and stimulation of colonic fibroblasts**

658 To isolate colonic fibroblasts, single cell suspensions were prepared as described above  
659 and cultured in DMEM containing 10% FBS, 1% GlutaMAX (Thermo Fisher

660 Scientific), 10 mM HEPES, 1% MEM Non-Essential Amino Acids Solution (100x)  
661 (Nacalai Tesque), 100 U/mL Penicillin, 100 µg/mL Streptomycin, and 2.5 µg/mL of  
662 Amphotericin B (Sigma). Culture medium was changed every day until colonic  
663 fibroblasts started to grow spontaneously.

664 To detect phosphorylation of STAT3 in colonic fibroblasts, colonic fibroblasts  
665 were stimulated with the indicated concentrations of IL-11 or IL-22 for 30 min. Total  
666 and phosphorylated STAT3 were analyzed by Western blotting.

667

#### 668 **Western Blotting**

669 Cells were lysed in a RIPA buffer (50mM Tris-HCl, pH 8.0, 150mM NaCl, 1% Nonidet  
670 P-40, 0.5% deoxycholate, 0.1% SDS, 25 mM β-glycerophosphate, 1mM sodium  
671 orthovanadate, 1mM sodium fluoride, 1 mM PMSF, 1 µg/ml aprotinin, and 1 µg/ml  
672 leupeptin). After centrifugation, cell lysates were subjected to SDS-PAGE and  
673 transferred onto polyvinylidene difluoride membranes (Millipore). The membranes  
674 were immunoblotted with the indicated antibodies. The membranes were developed  
675 with Super Signal West Dura extended duration substrate (Thermo Scientific) and  
676 analyzed by Amersham Biosciences imager 600 (GE Healthcare). In some experiments,

677 blots were quantified using freeware program Fiji.

678

679 **Enzyme-linked immunosorbent assay (ELISA)**

680 Concentrations of murine IL-11 in the culture supernatants were determined by ELISA

681 according to the manufacturers' instruction (R&D Systems).

682

683 **Knockdown of *IL11* by siRNAs**

684 A human breast cancer cell line, MDA-MB-231 cells were provided by T. Sakamoto.

685 MDA-MB-231 cells were maintained in DMEM containing 10% FBS. MDA-MB-231

686 cells were transfected with control or *IL11* siRNAs using Lipofectamine 2000

687 (Invitrogen) at a final concentration of 50 nM. At 36 h after transfection, knockdown

688 efficiency of IL-11 by siRNAs was analyzed by immunoblotting with anti-IL-11

689 antibody using cell lysates. Stealth RNAi<sup>TM</sup> siRNAs Negative Control, Med GC and

690 human *IL11*, NM\_000641.3 (HSS179893, HSS179894, HSS179895) were purchased

691 from Thermo Fisher Scientific.

692

693 **Comparison of the expression of enriched genes in IL-11<sup>+</sup> IAFs between human**  
694 **normal mucosa and colon cancer tissues**

695 The publicly available data set (GSE33113) was obtained from the Gene Expression  
696 Omnibus (GEO). This data set contains gene expression data from 90 colon cancer  
697 patients and 6 healthy persons. The expression data of enriched genes in IL-11<sup>+</sup> IAFs  
698 was retrieved from the data set (GSE33113) and their signaling intensities of each gene  
699 in normal mucosa and colon cancer tissues were compared.

700

701 **Survival analysis**

702 Two publicly available data sets (GSE17536 and GSE17537) were obtained from the  
703 Gene Expression Omnibus (GEO). These data sets contain gene expression data and  
704 disease-free survival information from 232 primary CRC patients. The expression levels  
705 of enriched genes in IL-11<sup>+</sup> IAFs in these data sets was classified by the hierarchical  
706 clustering. Each enriched gene in IL-11<sup>+</sup> IAFs was correlated with survival using the  
707 Kaplan-Meier method. Statistical significance was analyzed by Mantel-Cox log-rank  
708 test. R software was used for all statistical analysis.

709

710 **Human colorectal cancer tissues**

711 Human colon tumors and adjacent normal tissues were obtained from Toho University

712 Omori Medical Center and analyzed in accordance with approval by the Ethics

713 Committee of Toho University School of Medicine (A16111). Colon tumors included 10

714 cases of adenomas, 10 cases of early cancers, and 10 cases of advanced cancers.

715 Histological assessment of adenomas and adenocarcinomas was according to the

716 guidelines of the World Health Organization<sup>48</sup>. Early and advanced colon cancers were

717 determined according to the TNM criteria (pT1, early cancer; pT2-4, advanced

718 cancers)<sup>49</sup>.

719

720 **Statistical analysis**

721 Statistical significance was determined by the unpaired two-tailed Student's *t*-test,

722 Mann-Whitney U test, two-way ANOVA with Boniferroni's test, or one-way ANOVA

723 with Tukey's post-hoc test, Mantel-Cox log-rank test as indicated. \* $p < 0.05$  was

724 considered to be statistically significant. All statistical analysis was performed with



725 Graph Pad Prism 7 software (GraphPad Software).

726

727

728

729

730

731

732 **ACKNOWLEDGEMENTS**

733 We thank T. Sakamoto for MDA-MB-231 cells. We also thank Y. Kurashima, H. Kiyono,  
734 M. Kikkawa, M. Aoki, A. Nakajima, E. Tosti, and L.S. Lopez for technical advice. This  
735 work was supported in part by Grants-in-Aid for Scientific Research (B) 17H04069 (to  
736 HN); Young Scientists (B) 17K15626 (to TN); Grants-in-Aid for Scientific Research  
737 (C) 26460397 (to TN); Challenging Exploratory Research 17K19533 (to HN) from  
738 Japan Society for the Promotion of Science (JSPS); Scientific Research on Innovative  
739 Areas 26110003 (to HN); the Japan Agency for Medical Research and Development  
740 (AMED) through AMED-CREST (JP19gm1210002, to HN); Private University  
741 Research Branding project (to TM and HN) from the MEXT (Ministry of Education,  
742 Culture, Sports, Science and Technology), Japan; and research grants from the Uehara  
743 Memorial Foundation (to TN) and the Takeda Science Foundation (to TN).

744

745 **AUTHOR CONTRIBUTIONS**

746 T.N. and H.N. designed research; T.N., Y.D., W.T., M.O., D.O., S.Y., M.K., E.N., Y.K.,  
747 S.A-A., M.H., N.I., and N.T. performed research; M.N., M.O., H.Y., K.S., and T.M.

748 contributed to new reagents/analytical tools; T.N., Y.D., W.T., D.O., N.I., and H.N.

749 analyzed data; T.N., N.I., and H.N. wrote the paper.

750

751 **CONFLICT OF INTEREST**

752 The authors declare that they do not have competing financial interests.

753

754

755

756

757 **REFERENCES**

- 758 1. Peterson LW, Artis D. Intestinal epithelial cells: regulators of barrier function  
759 and immune homeostasis. *Nat Rev Immunol* **14**, 141-153 (2014).  
760
- 761 2. Leoni G, Neumann PA, Sumagin R, Denning TL, Nusrat A. Wound repair: role  
762 of immune-epithelial interactions. *Mucosal Immunol* **8**, 959-968 (2015).  
763
- 764 3. Kurashima Y, Kiyono H. Mucosal Ecological Network of Epithelium and  
765 Immune Cells for Gut Homeostasis and Tissue Healing. *Annu Rev Immunol* **35**,  
766 119-147 (2017).  
767
- 768 4. Powell DW, Pinchuk IV, Saada JI, Chen X, Mifflin RC. Mesenchymal cells of  
769 the intestinal lamina propria. *Annu Rev Physiol* **73**, 213-237 (2011).  
770
- 771 5. Nowarski R, Jackson R, Flavell RA. The Stromal Intervention: Regulation of  
772 Immunity and Inflammation at the Epithelial-Mesenchymal Barrier. *Cell* **168**,  
773 362-375 (2017).  
774
- 775 6. Isella C, *et al.* Stromal contribution to the colorectal cancer transcriptome. *Nat*  
776 *Genet* **47**, 312-319 (2015).  
777
- 778 7. Calon A, *et al.* Stromal gene expression defines poor-prognosis subtypes in  
779 colorectal cancer. *Nat Genet* **47**, 320-329 (2015).  
780
- 781 8. Koliaraki V, Pallangyo CK, Greten FR, Kollias G. Mesenchymal Cells in Colon  
782 Cancer. *Gastroenterology* **152**, 964-979 (2017).  
783
- 784 9. Smillie CS, *et al.* Intra- and Inter-cellular Rewiring of the Human Colon during  
785 Ulcerative Colitis. *Cell* **178**, 714-730.e722 (2019).  
786
- 787 10. Su S, *et al.* CD10(+)GPR77(+) Cancer-Associated Fibroblasts Promote Cancer

- 788 Formation and Chemoresistance by Sustaining Cancer Stemness. *Cell* **172**,  
789 841-856 e816 (2018).  
790
- 791 11. Putoczki T, Ernst M. More than a sidekick: the IL-6 family cytokine IL-11 links  
792 inflammation to cancer. *J Leukoc Biol* **88**, 1109-1117 (2010).  
793
- 794 12. Jones SA, Jenkins BJ. Recent insights into targeting the IL-6 cytokine family in  
795 inflammatory diseases and cancer. *Nat Rev Immunol* **18**, 773-789 (2018).  
796
- 797 13. West NR. Coordination of Immune-Stroma Crosstalk by IL-6 Family Cytokines.  
798 *Front Immunol* **10**, 1093 (2019).  
799
- 800 14. Gibson DL, *et al.* Interleukin-11 reduces TLR4-induced colitis in  
801 TLR2-deficient mice and restores intestinal STAT3 signaling. *Gastroenterology*  
802 **139**, 1277-1288 (2010).  
803
- 804 15. Kiessling S, *et al.* Functional expression of the interleukin-11 receptor  
805 alpha-chain and evidence of antiapoptotic effects in human colonic epithelial  
806 cells. *J Biol Chem* **279**, 10304-10315 (2004).  
807
- 808 16. Yoshizaki A, Nakayama T, Yamazumi K, Yakata Y, Taba M, Sekine I.  
809 Expression of interleukin (IL)-11 and IL-11 receptor in human colorectal  
810 adenocarcinoma: IL-11 up-regulation of the invasive and proliferative activity of  
811 human colorectal carcinoma cells. *Int J Oncol* **29**, 869-876 (2006).  
812
- 813 17. Putoczki TL, *et al.* Interleukin-11 is the dominant IL-6 family cytokine during  
814 gastrointestinal tumorigenesis and can be targeted therapeutically. *Cancer Cell*  
815 **24**, 257-271 (2013).  
816
- 817 18. Molet S, *et al.* IL-17 is increased in asthmatic airways and induces human  
818 bronchial fibroblasts to produce cytokines. *J Allergy Clin Immunol* **108**, 430-438  
819 (2001).  
820

- 821 19. Andoh A, *et al.* Interleukin-22, a member of the IL-10 subfamily, induces  
822 inflammatory responses in colonic subepithelial myofibroblasts.  
823 *Gastroenterology* **129**, 969-984 (2005).  
824
- 825 20. Bamba S, Andoh A, Yasui H, Makino J, Kim S, Fujiyama Y. Regulation of IL-11  
826 expression in intestinal myofibroblasts: role of c-Jun AP-1- and  
827 MAPK-dependent pathways. *Am J Physiol Gastrointest Liver Physiol* **285**,  
828 G529-538 (2003).  
829
- 830 21. Tang W, Yang L, Yang YC, Leng SX, Elias JA. Transforming growth factor-beta  
831 stimulates interleukin-11 transcription via complex activating  
832 protein-1-dependent pathways. *J Biol Chem* **273**, 5506-5513 (1998).  
833
- 834 22. Nishina T, *et al.* Interleukin-11 links oxidative stress and compensatory  
835 proliferation. *Sci Signal* **5**, ra5 (2012).  
836
- 837 23. Nishina T, *et al.* Critical Contribution of Nuclear Factor Erythroid 2-related  
838 Factor 2 (NRF2) to Electrophile-induced Interleukin-11 Production. *J Biol Chem*  
839 **292**, 205-216 (2017).  
840
- 841 24. Calon A, *et al.* Dependency of colorectal cancer on a TGF-beta-driven program  
842 in stromal cells for metastasis initiation. *Cancer Cell* **22**, 571-584 (2012).  
843
- 844 25. Zhang X, *et al.* IL-11 Induces Th17 Cell Responses in Patients with Early  
845 Relapsing-Remitting Multiple Sclerosis. *J Immunol* **194**, 5139-5149 (2015).  
846
- 847 26. Klein W, *et al.* A polymorphism in the IL11 gene is associated with ulcerative  
848 colitis. *Genes Immun* **3**, 494-496 (2002).  
849
- 850 27. Sabzevary-Ghahfarokhi M, *et al.* The expression analysis of Fra-1 gene and  
851 IL-11 protein in Iranian patients with ulcerative colitis. *BMC Immunol* **19**, 17  
852 (2018).  
853

- 854 28. Strikoudis A, *et al.* Modeling of Fibrotic Lung Disease Using 3D Organoids  
855 Derived from Human Pluripotent Stem Cells. *Cell Rep* **27**, 3709-3723 e3705  
856 (2019).  
857
- 858 29. Schafer S, *et al.* IL-11 is a crucial determinant of cardiovascular fibrosis. *Nature*  
859 **552**, 110-115 (2017).  
860
- 861 30. Neufert C, Becker C, Neurath MF. An inducible mouse model of colon  
862 carcinogenesis for the analysis of sporadic and inflammation-driven tumor  
863 progression. *Nat Protoc* **2**, 1998-2004 (2007).  
864
- 865 31. Tanaka T, Kohno H, Suzuki R, Yamada Y, Sugie S, Mori H. A novel  
866 inflammation-related mouse colon carcinogenesis model induced by  
867 azoxymethane and dextran sodium sulfate. *Cancer Sci* **94**, 965-973 (2003).  
868
- 869 32. Moser AR, Pitot HC, Dove WF. A Dominant Mutation That Predisposes to  
870 Multiple Intestinal Neoplasia in the Mouse. *Science* **247**, 322-324 (1990).  
871
- 872 33. Su LK, *et al.* Multiple Intestinal Neoplasia Caused by a Mutation in the Murine  
873 Homolog of the Apc Gene. *Science* **256**, 668-670 (1992).  
874
- 875 34. Deguchi Y, *et al.* Generation of and characterization of anti-IL-11 antibodies  
876 using newly established Il11-deficient mice. *Biochem Biophys Res Commun* **505**,  
877 453-459 (2018).  
878
- 879 35. Sakai E, *et al.* Combined Mutation of Apc, Kras, and Tgfbr2 Effectively Drives  
880 Metastasis of Intestinal Cancer. *Cancer Res* **78**, 1334-1346 (2018).  
881
- 882 36. Pickert G, *et al.* STAT3 links IL-22 signaling in intestinal epithelial cells to  
883 mucosal wound healing. *J Exp Med* **206**, 1465-1472 (2009).  
884
- 885 37. Yoshida GJ, Azuma A, Miura Y, Orimo A. Activated Fibroblast Program  
886 Orchestrates Tumor Initiation and Progression; Molecular Mechanisms and the

- 887 Associated Therapeutic Strategies. *Int J Mol Sci* **20**, (2019).  
888
- 889 38. Turley SJ, Cremasco V, Astarita JL. Immunological hallmarks of stromal cells in  
890 the tumour microenvironment. *Nat Rev Immunol* **15**, 669-682 (2015).  
891
- 892 39. Dasch JR, Pace DR, Waegell W, Inenaga D, Ellingsworth L. Monoclonal  
893 antibodies recognizing transforming growth factor-beta. Bioactivity  
894 neutralization and transforming growth factor beta 2 affinity purification. *J*  
895 *Immunol* **142**, 1536-1541 (1989).  
896
- 897 40. Nandurkar HH, Robb L, Tarlinton D, Barnett L, Kontgen F, Begley CG. Adult  
898 mice with targeted mutation of the interleukin-11 receptor (IL11Ra) display  
899 normal hematopoiesis. *Blood* **90**, 2148-2159 (1997).  
900
- 901 41. Kimura Y, Yanagimachi R. Intracytoplasmic sperm injection in the mouse. *Biol*  
902 *Reprod* **52**, 709-720 (1995).  
903
- 904 42. Viennois E, Chen F, Laroui H, Baker MT, Merlin D. Dextran sodium sulfate  
905 inhibits the activities of both polymerase and reverse transcriptase: lithium  
906 chloride purification, a rapid and efficient technique to purify RNA. *BMC Res*  
907 *Notes* **6**, 360 (2013).  
908
- 909 43. Huang DW, Sherman BT, Lempicki RA. Bioinformatics enrichment tools: paths  
910 toward the comprehensive functional analysis of large gene lists. *Nucleic Acids*  
911 *Research* **37**, 1-13 (2009).  
912
- 913 44. Huang DW, Sherman BT, Lempicki RA. Systematic and integrative analysis of  
914 large gene lists using DAVID bioinformatics resources. *Nature Protocols* **4**,  
915 44-57 (2009).  
916
- 917 45. Lochner M, *et al*. Microbiota-induced tertiary lymphoid tissues aggravate  
918 inflammatory disease in the absence of RORgamma t and LTi cells. *J Exp Med*  
919 **208**, 125-134 (2011).



920

921 46. Sato T, *et al.* Long-term expansion of epithelial organoids from human colon,  
922 adenoma, adenocarcinoma, and Barrett's epithelium. *Gastroenterology* **141**,  
923 1762-1772 (2011).

924

925 47. Mihara E, *et al.* Active and water-soluble form of lipidated Wnt protein is  
926 maintained by a serum glycoprotein afamin/alpha-albumin. *Elife* **5**, (2016).

927

928 48. Aaltonen LA, Hamilton SR, World Health Organization., International Agency  
929 for Research on Cancer. *Pathology and genetics of tumours of the digestive*  
930 *system*. IARC Press ;

931 Oxford University Press (distributor (2000).

932

933 49. Sobin LH, Gospodarowicz MK, Wittekind C, International Union against Cancer.  
934 *TNM classification of malignant tumours*, 7th edn. Wiley-Blackwell (2010).

935

936

937

938

939

940

941

942 **FIGURE LEGENDS**

943 **Fig. 1.** Characterization of IL-11<sup>+</sup> Cells in CAC Using *Il11-Egfp* Reporter Mice. **a**  
944 Protocol for induction of AOM/DSS-induced CAC in mice. *Il11-Egfp* reporter mice  
945 were intraperitoneally injected with AOM on day 0, followed by repeated DSS  
946 administration. Colorectal cancer gradually develops on ~30 days after AOM injection.  
947 Unless otherwise indicated, the following experiments used tumor and nontumor tissues  
948 collected on day 98–105 after AOM/DSS treatment. **b** Representative image of tumor  
949 and adjacent nontumor tissues in the colon of mice on day 77 after AOM injection.  
950 Colonic sections were stained with hematoxylin & eosin (H&E). Scale bar, 200  $\mu$ m. **c**  
951 Prepared mRNA samples from tumor and nontumor tissues were analyzed by qPCR to  
952 determine expression of the indicated genes. Results are mean  $\pm$  SE (n = 6–10 mice). **d**,  
953 **e** From colonic tumor tissues of wild-type or *Il11-Egfp* reporter mice, single-cell  
954 suspensions were prepared, and percentages of IL-11<sup>+</sup> cells were determined.  
955 Representative flow cytometry images are shown (**d**). Results are mean  $\pm$  SE (n = 7  
956 mice). Cells were stained with the indicated antibodies, and expression on EGFP<sup>+</sup> cells  
957 was analyzed by flow cytometry (**e**). Results are representative of four independent

958 experiments. **f** Nontumor and tumor tissue sections were stained with anti-GFP antibody.  
959 Scale bars, 100  $\mu\text{m}$ . **g, h** Tumor sections were stained with the indicated antibodies (red)  
960 and with anti-GFP antibody (green) ( $n = 3$  mice). Right panels show enlarged images of  
961 white boxes from left panels. White arrowheads indicate merged cells. Scale bars, 100  
962  $\mu\text{m}$ , unless otherwise indicated. Statistical significance was determined by two-tailed  
963 unpaired Student's *t*-test (**c, d**). \* $p < 0.05$ ; \*\* $p < 0.01$ ; \*\*\* $p < 0.001$ .

964

965 **Fig. 2. IL-11<sup>+</sup> Cells Appear in Tumor Tissues in the Absence of Inflammation. a**

966 Elevated *Il11* and *Egfp* expression in colonic tumors from *Apc<sup>min/+</sup>;Il11-Egfp* reporter  
967 mice. Experiments were performed using tumor and nontumor tissues from the colon of  
968 20- to 24-week-old *Apc<sup>min/+</sup>;Il11-Egfp* reporter mice. *Il11* and *Egfp* mRNA expression  
969 was determined by qPCR. Results are mean  $\pm$  SE ( $n = 5$  mice). **b** Colonic tissue sections  
970 from *Apc<sup>min/+</sup>;Il11-Egfp* reporter mice were stained with H&E (upper panels) or  
971 anti-GFP antibody (lower panels). Middle and right panels, respectively, show  
972 enlargements of the black and red boxes from the left panels. Red arrowheads indicate  
973 tumor cells. Scale bar, 100  $\mu\text{m}$ . **c, d** IL-11<sup>+</sup> cells express stromal cell markers and, to a

974 lesser extent, hematopoietic or epithelial cell markers. Colonic cells were prepared from  
975 tumors of *Apc*<sup>min/+</sup>; *Il11-Egfp* reporter mice, stained with the indicated antibodies, and  
976 analyzed by flow cytometry. Percentages of IL-11<sup>+</sup> cells were determined (**c**). Results  
977 are mean ± SE (n = 3 mice). Representative histograms show expressions of the  
978 indicated markers on EGFP<sup>+</sup> cells (**d**). Results are representative of three independent  
979 experiments. **e–g** Characterization of IL-11<sup>+</sup> cells by IHC. Colonic tumor sections from  
980 *Apc*<sup>min/+</sup>; *Il11-Egfp* reporter mice were stained with the indicated antibodies (red) and  
981 anti-GFP antibody (green). White arrowheads indicate merged cells. Scale bar, 100 μm,  
982 unless otherwise indicated. Statistical significance was determined by two-tailed  
983 unpaired Student's *t*-test (**a**, **c**). \*\**p* < 0.01; \*\*\**p* < 0.001.

984

985 **Fig. 3.** IL-11<sup>+</sup> Cells Appear in the Colon of DSS-Treated Mice and Express Stromal Cell  
986 Marker. **a** *Il11-Egfp* reporter mice were treated with 1.5% DSS in drinking water for 5  
987 days, followed by a change to regular water. On day 7 after DSS treatment, *Il11* and  
988 *Egfp* mRNA expression in the colon was determined by qPCR. Results are mean ± SE  
989 (n = 9 mice). **b**, **c** Appearance of IL-11<sup>+</sup> cells in submucosal tissues of the colon of

990 *Il11-Egfp* reporter mice on post-DSS treatment day 5 (b) or day 1 (c). Colonic tissue  
991 sections from untreated or DSS-treated *Il11-Egfp* reporter mice were H&E stained or  
992 immunostained with anti-GFP antibody. Right panels show enlargements of the boxes  
993 (b). Scale bar, 100  $\mu$ m. **d, e** Characterization of cell surface markers on IL-11<sup>+</sup> cells.  
994 Colonic cells were prepared from the colon of *Il11-Egfp* reporter mice as in (b). We  
995 determined the percentages of EGFP<sup>+</sup> (IL-11<sup>+</sup>) cells from the colon before and after  
996 DSS treatment (d). Cells were stained with the indicated antibodies, and marker  
997 expressions were analyzed on GFP-positive cells (e). Results are representative of three  
998 independent experiments. **f** Representative immunostaining of IL-11<sup>+</sup> cells. Colonic  
999 tissue sections were prepared from *Il11-Egfp* reporter mice as in (b), and  
1000 immunostained with the indicated antibodies and anti-GFP antibody. Results are merged  
1001 images. Right panels are enlarged images from the boxes (n = 3–4 mice). White  
1002 arrowheads indicate merged cells. **g** IL-11<sup>+</sup> cells do not proliferate *in situ*. *Il11-Egfp*  
1003 reporter mice were treated with DSS as in (a), and intraperitoneally administered BrdU  
1004 (40 mg/kg) on day 6. On day 7, colonic sections were prepared and stained with  
1005 anti-GFP and anti-BrdU antibodies. Results are representative images from three

1006 independent experiments. Scale bars, 100  $\mu$ m, unless otherwise indicated. Statistical  
1007 significance was determined by two-tailed unpaired Student's *t*-test (**a**). \**p* < 0.05.

1008

1009 **Fig. 4.** IL-11<sup>+</sup> Cells Express Genes Associated with Cell Proliferation and Tissue Repair.

1010 On day 7 after DSS treatment, cells were isolated from the colon of *Il11-Egfp* reporter

1011 mice, and IL-11<sup>+</sup> cells (EGFP<sup>+</sup>) were sorted by flow cytometry. We isolated mRNA

1012 from IL-11<sup>-</sup> and IL-11<sup>+</sup> cells, and analyzed the gene expression by microarray analysis

1013 (n = 3). **a** Heat map of microarray gene expression of IL-11<sup>-</sup> and IL-11<sup>+</sup> cells. Legend

1014 on right shows gene-expression color normalized by Z-score transformation. **b** Volcano

1015 plot of whole genes. Horizontal line indicates genes differentially regulated in IL-11<sup>+</sup>

1016 cells compared to IL-11<sup>-</sup> cells, shown in log<sub>2</sub>. Vertical line indicates p values of

1017 statistical significance, shown in -log<sub>10</sub>. Significantly upregulated and downregulated

1018 genes are indicated by red and blue dots, respectively. Several upregulated genes are

1019 plotted. **c** Gene Ontology (GO) terms that were significantly enriched in IL-11<sup>+</sup> cells

1020 compared to IL-11<sup>-</sup> cells. **d, e** Gene expressions were analyzed by qPCR. Results are

1021 mean  $\pm$  SE (n = 4 mice). Statistical significance was determined by two-tailed unpaired

1022 Student's *t*-test (**c, d**). \**p* < 0.05; \*\**p* < 0.01; \*\*\**p* < 0.001; ns, not significant.

1023

1024 **Fig. 5.** The MEK/ERK Pathway is Involved in *Illi* Upregulation in Tumor Tissues. **a, b**

1025 Wild-type mice were treated with DSS with or without NAC (**a**) or Abx (**b**). Colonic

1026 cells were prepared and stained with CellRox-green, and ROS accumulation was

1027 analyzed by flow cytometry. Left panels show representative histograms of ROS levels

1028 in colonic cells. Right panels show percentages of CellRox-green-positive cells of an

1029 individual mouse. Results are mean ± SE (n = 3–4 mice). **c** Wild-type mice were treated

1030 as in A. Colonic expressions of *16S rRNA*, *Hmox1*, and *Illi* mRNA were determined by

1031 qPCR. Results are mean ± SE (n = 11). **d** Abx blocked *Illi* mRNA upregulation in the

1032 colon of DSS-treated mice. Wild-type mice were untreated or treated with DSS in the

1033 absence or presence of Abx. On day 7 after DSS treatment, qPCR was performed to

1034 determine the expression of bacterial *16S rRNA* and *Illi* mRNA in the colon. Results

1035 are mean ± SE (n = 10). **e, f** Trametinib inhibits ERK phosphorylation and *Illi* mRNA

1036 expression in the colon of DSS-treated mice. Wild-type mice were treated with DSS in

1037 the absence or presence of trametinib, and then colonic sections were prepared and

1038 stained with anti-pERK antibody (**e**). Scale bars, 100  $\mu$ m. *Illl* mRNA expression was  
1039 determined by qPCR (**f**). Results are mean  $\pm$  SE (n = 13–14). **g** NAC inhibits ERK  
1040 phosphorylation in the colon of DSS-treated mice. Wild-type mice were treated with  
1041 DSS in the absence or presence of NAC in the drinking water for 5 days. Colonic  
1042 sections were stained with anti-pERK antibody. Results are representative of three  
1043 independent experiments. Scale bar, 100  $\mu$ m. **h** *Tgfb3* expression in the colon of  
1044 DSS-treated wild-type mice. Wild-type mice were treated with DSS as in Fig. 4a. On  
1045 day 7 after DSS treatment, qPCR was performed to determine *Tgfb1*, *Tgfb2*, and *Tgfb3*  
1046 mRNA expression in the colon. Results are mean  $\pm$  SE (n = 8–10 mice). **i** Treatment  
1047 with anti-TGF $\beta$  antibody does not downregulate *Illl* mRNA expression in the colon of  
1048 DSS-treated mice. Mice were intraperitoneally administered 100  $\mu$ g anti-TGF $\beta$   
1049 antibody on days 2 and 4 after DSS administration, and sacrificed on day 5. *Illl* mRNA  
1050 expression was determined by qPCR. Results are mean  $\pm$  SE (n = 11–16 mice). **j**  
1051 Schema of administration of various inhibitors in AOM/DSS-treated mice. Mice were  
1052 treated with Abx for 8 weeks, NAC for 4 weeks, trametinib at –6 and –30 hours, or  
1053 anti-TGF $\beta$  antibody on day –1, –3, –5 (just before sacrifice). **k–m, o** Mice were treated



1054 as in Figure 1A, and then treated with Abx (**k**) (n = 7–9 mice), NAC (**l**) (n = 7–11 mice),  
1055 trametinib (**m**) (n = 10–12 mice), or anti-TGF $\beta$  antibody (n = 6–7 mice) (**o**) as in (**j**). On  
1056 day 98–105 after AOM injection, mRNA was extracted from tumor and non-tumor  
1057 tissues, and *Il1l* expression was determined by qPCR. Results are mean  $\pm$  SE. **n** Mice  
1058 were treated as in Fig. 1a. *Tgfb1*, *Tgfb2*, and *Tgfb3* expressions in tumor and nontumor  
1059 tissues were determined by qPCR. Results are mean  $\pm$  SE (n = 7 mice). Statistical  
1060 significance was determined using the unpaired two-tailed Student's *t*-test (**c**, **h**),  
1061 Mann-Whitney U test (**f**, **i**), two-way ANOVA with Bonferroni's test (**d**, **k**, **l**, **m**, **o**), or  
1062 one-way ANOVA with Tukey's post-hoc test (**a**, **b**). \**p* < 0.05; \*\**p* < 0.01; \*\*\**p* <  
1063 0.001; ns, not significant.

1064

1065 **Fig. 6** IL-11 Preferentially Induces Signals to Fibroblasts. **a** Relative expressions of  
1066 *Il11ra1*, *Il22ra1*, and *Il6st* in colonic epithelial organoids and colonic fibroblasts.  
1067 Colonic epithelial organoids and fibroblasts were established from wild-type mice as  
1068 described in the methods. Expressions of the indicated genes were determined by qPCR.  
1069 Results are mean  $\pm$  sd of triplicate samples and representative of two independent

1070 experiments. **b** Colonic epithelial organoids and fibroblasts were unstimulated or  
1071 stimulated for 30 min with IL-11 (10 or 100 ng/mL) or IL-22 (10 or 100 ng/mL). Total  
1072 STAT3 and phosphorylated STAT3 (pSTAT3) were analyzed by Western blotting.  
1073 STAT3 and pSTAT3 signaling intensities were calculated by Fiji, and the relative ratio  
1074 of pSTAT3/STAT3 is shown. Results are representative of two independent experiments.

1075 **c** Administration of IL-11R agonist induces expression of the genes expressed in IL-11<sup>+</sup>  
1076 cells. We injected 8-week-old wild-type mice with 10 µg IL-11R agonist. At 3 hours  
1077 after injection, mRNA was isolated from the colon, and gene expressions were analyzed  
1078 by microarray analysis (n = 2 for untreated samples; n = 3 for injected samples). Heat  
1079 map of microarray gene expression in the colon of untreated and treated mice (**c**).  
1080 Legend on the right shows gene-expression color normalized by Z-score transformation.

1081 **d** Volcano plot of whole genes. Horizontal line indicates differentially regulated genes  
1082 in the colon after IL-11R agonist injection compared to before injection, shown in log<sub>2</sub>.  
1083 Vertical line indicates p values of statistical significance, shown in -log<sub>10</sub>. Significantly  
1084 upregulated genes are indicated by red dots. Several upregulated genes are plotted. **e**  
1085 Venn diagram of genes elevated in IL-11<sup>+</sup> IAFs compared to IL-11<sup>-</sup> cells, and genes

1086 elevated in the colon with IL-11R agonist treatment compared to untreated colon.

1087 Overlapping area includes 18 genes. Statistical significance was determined by

1088 two-tailed unpaired Student's *t*-test (**a**). \**p* < 0.05; \*\**p* < 0.01; \*\*\*\**p* < 0.0001.

1089

1090 **Fig. 7.** IL-11 Expression is Correlated with Progression of Human Cancers. **a**

1091 Specificity of anti-IL-11 antibody used in the study. MDA-MB-231 cells were treated

1092 with control or three different siRNAs against human *IL11*, and IL-11 expression in cell

1093 lysates was analyzed by Western blotting with anti-IL-11 and anti-tubulin antibodies.

1094 Results are representative of two independent experiments. **b-d** Adenomas (n = 10),

1095 early (n = 10) and advanced (n = 10) colorectal cancers were stained with anti-IL-11

1096 antibody (**b**). Representative staining of respective tumors and adjacent normal tissues.

1097 Scale bars, 100  $\mu$ m. Areas (**c**) and intensities (**d**) of IL-11<sup>+</sup> signals were calculated as in

1098 the methods. Results are mean  $\pm$  SE. **e** Tissues of advanced colorectal cancers were

1099 stained with anti-vimentin, anti-CD45, or anti-E-cadherin antibodies along with

1100 anti-IL-11 antibody (n = 3). Right panels are enlarged images of the white box in the

1101 left panels. Signaling intensities stained with the indicated antibodies on the white

1102 arrows were calculated and plotted in the right panels. Scale bars, 100  $\mu\text{m}$ . Statistical

1103 significance was determined by Mann-Whitney U test (**c, d**). **\*\*p** < 0.01; ns, not

1104 significant.

1105

1106

## NishinaFig1

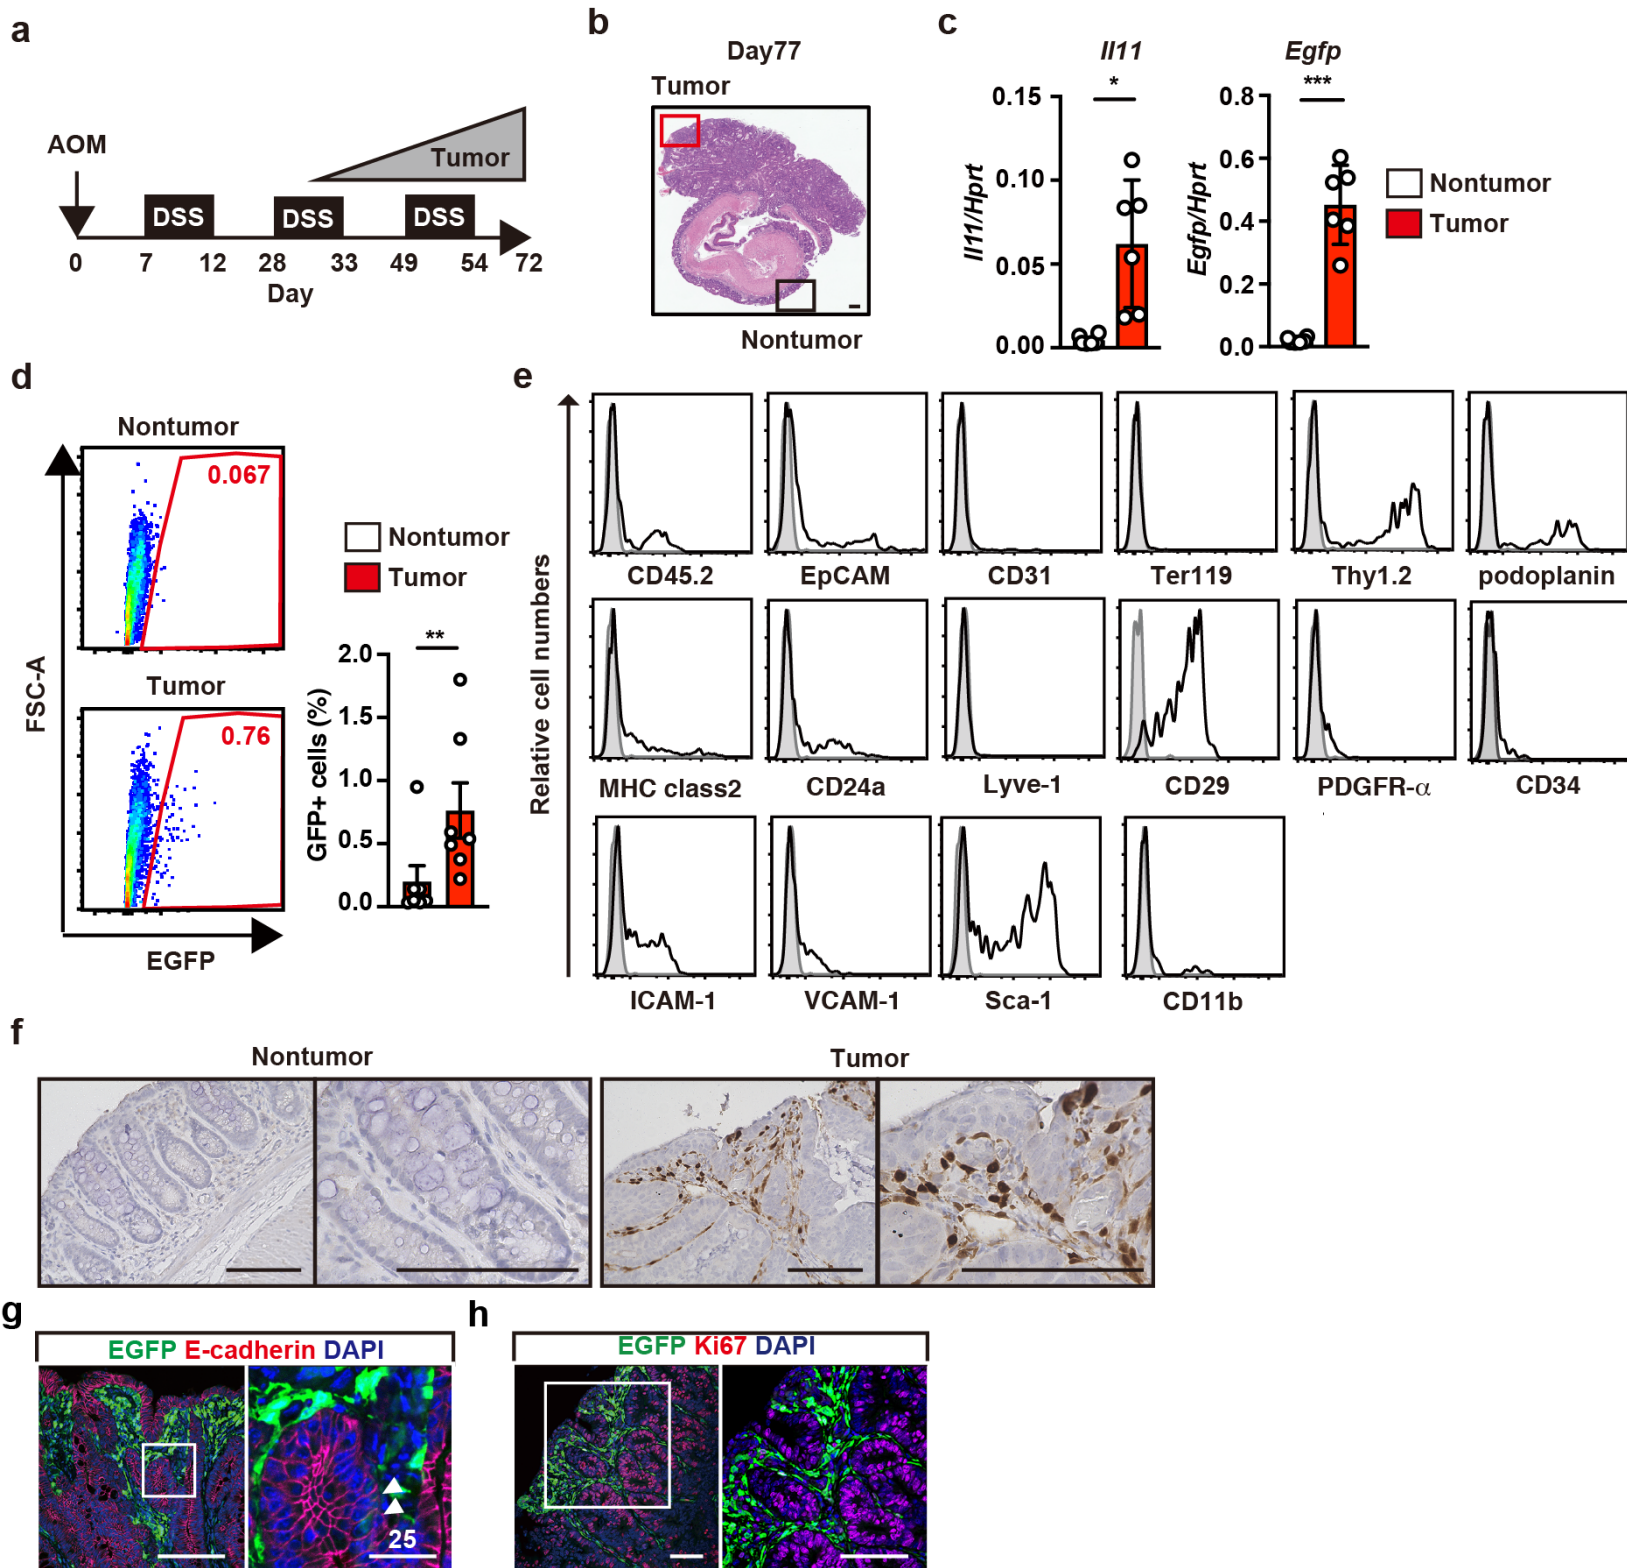

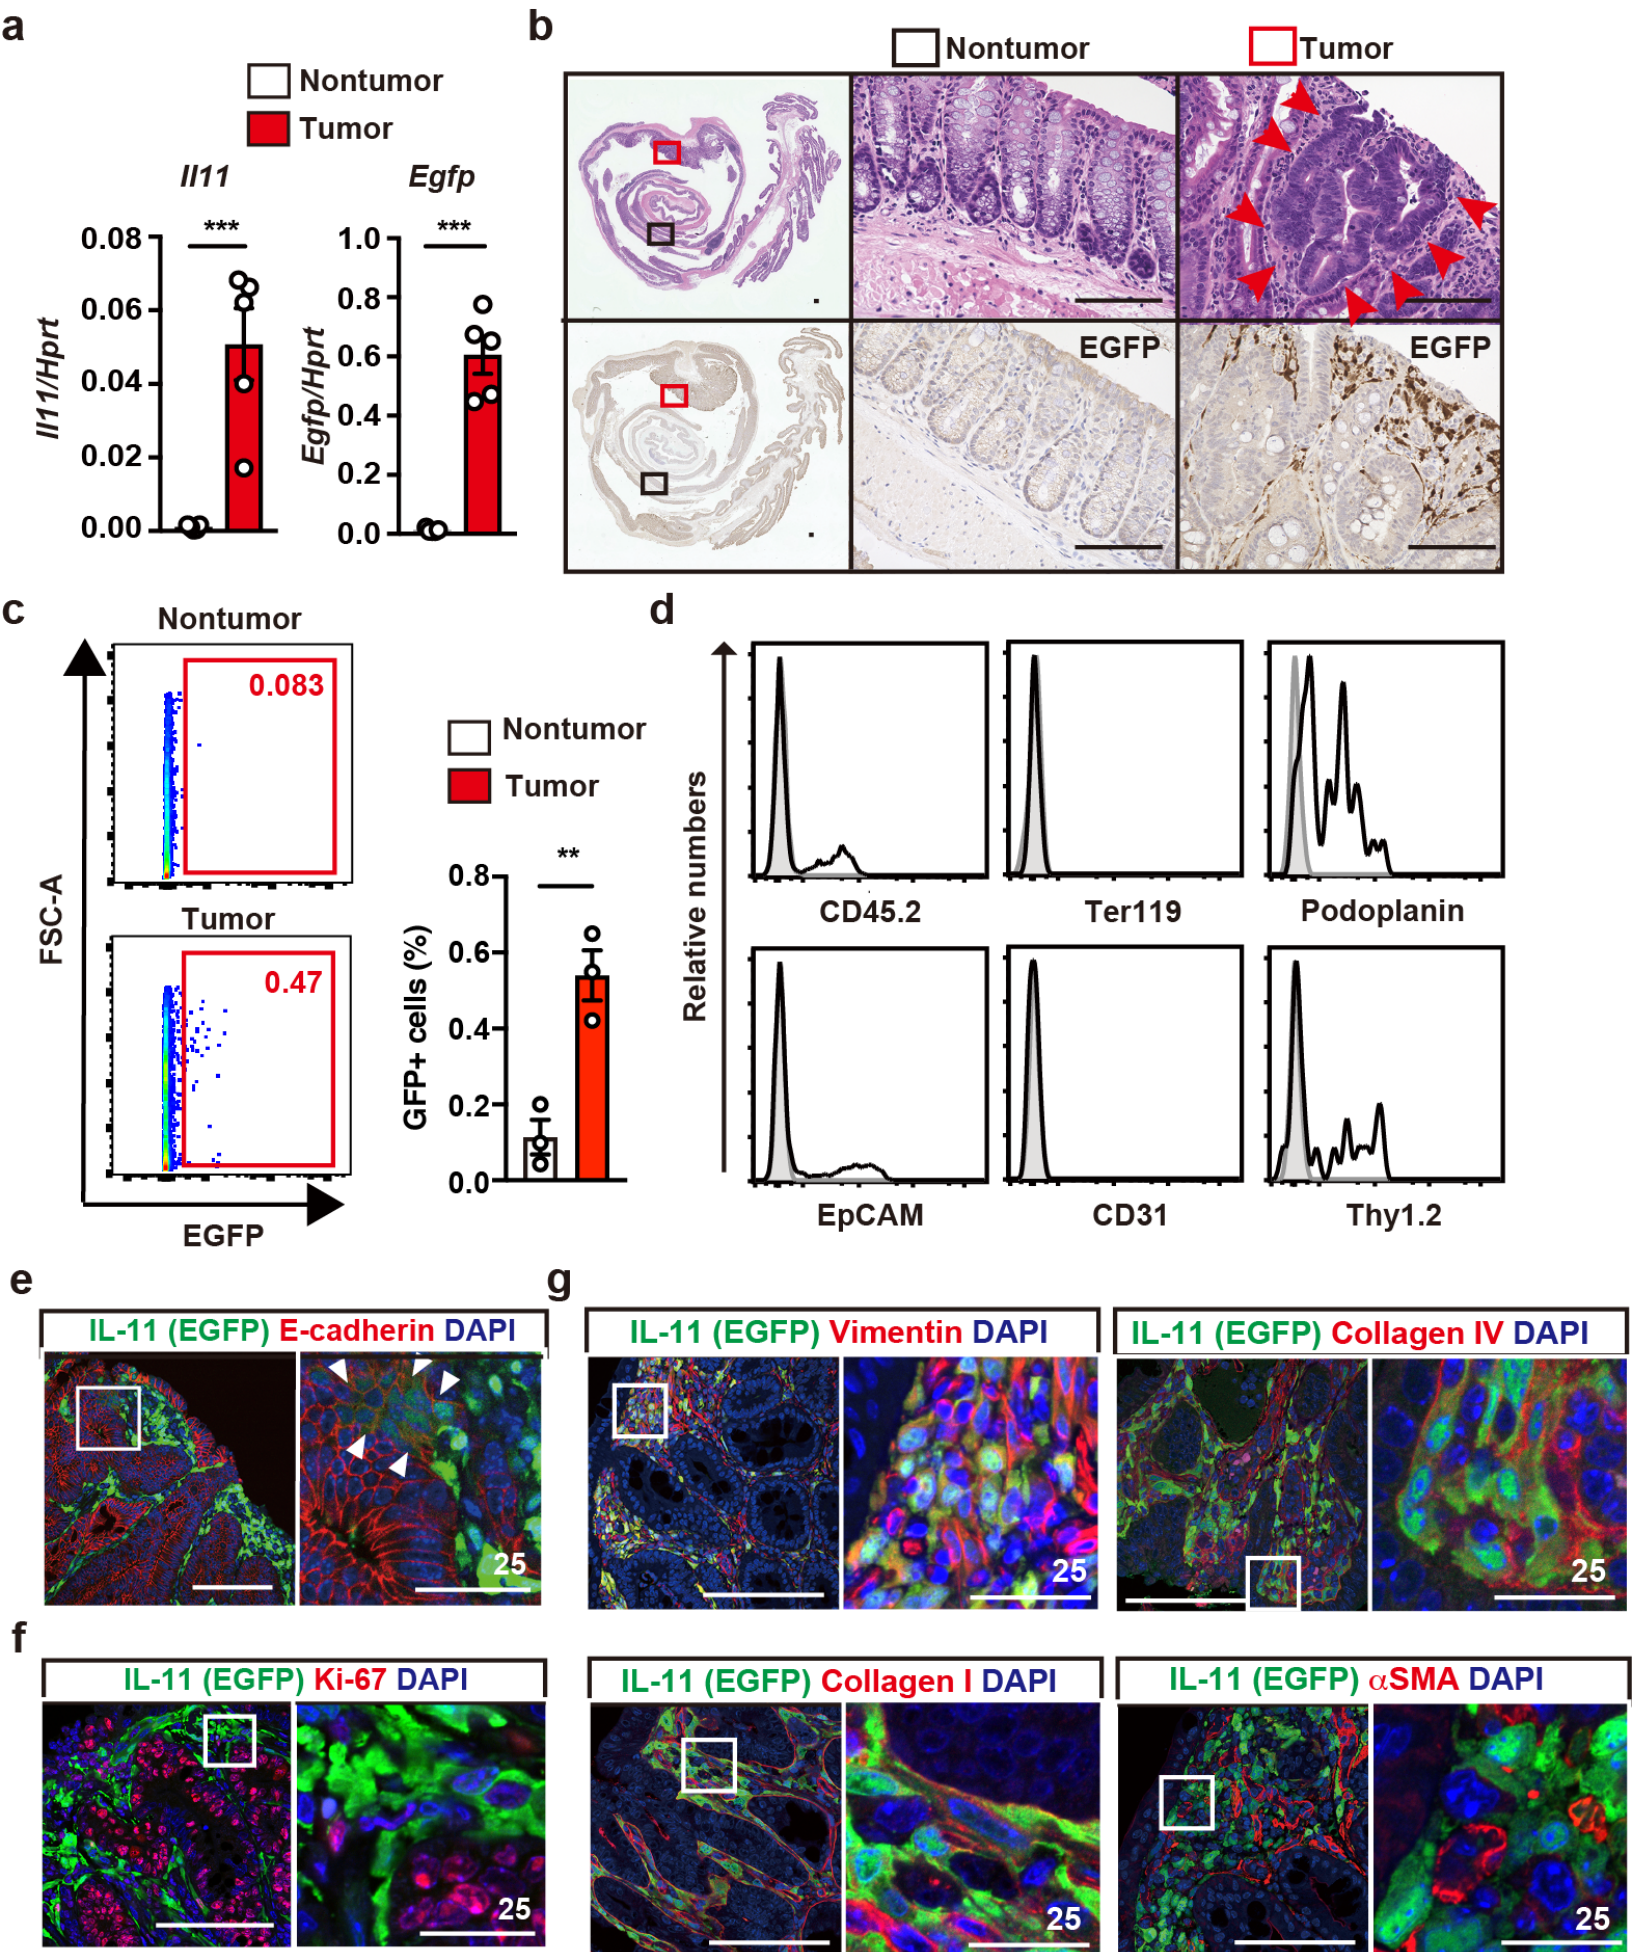

## Nishina Fig3

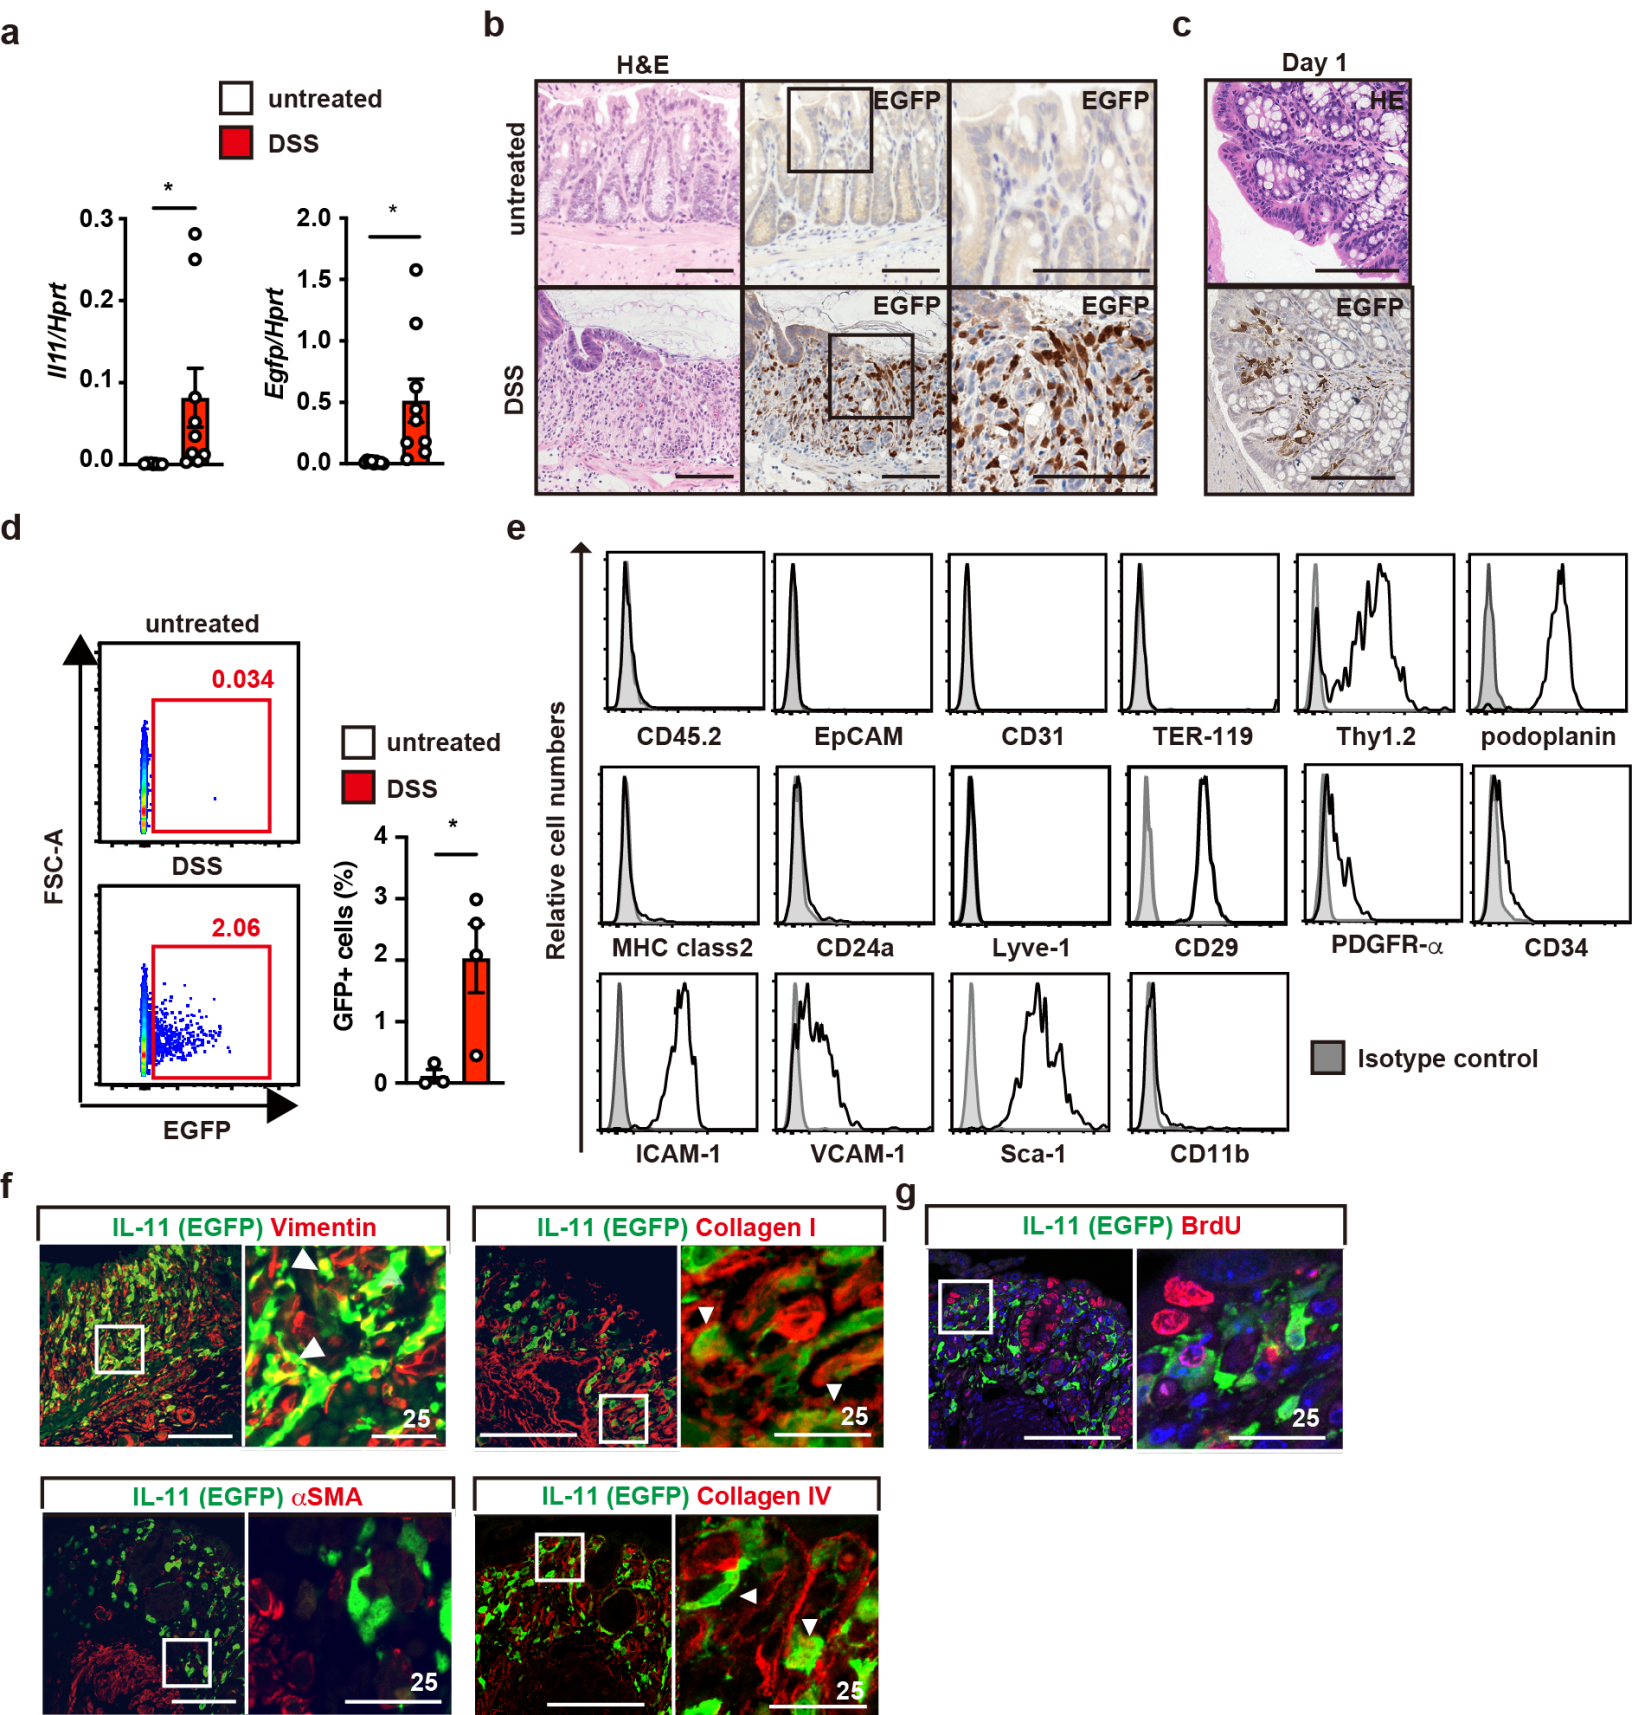

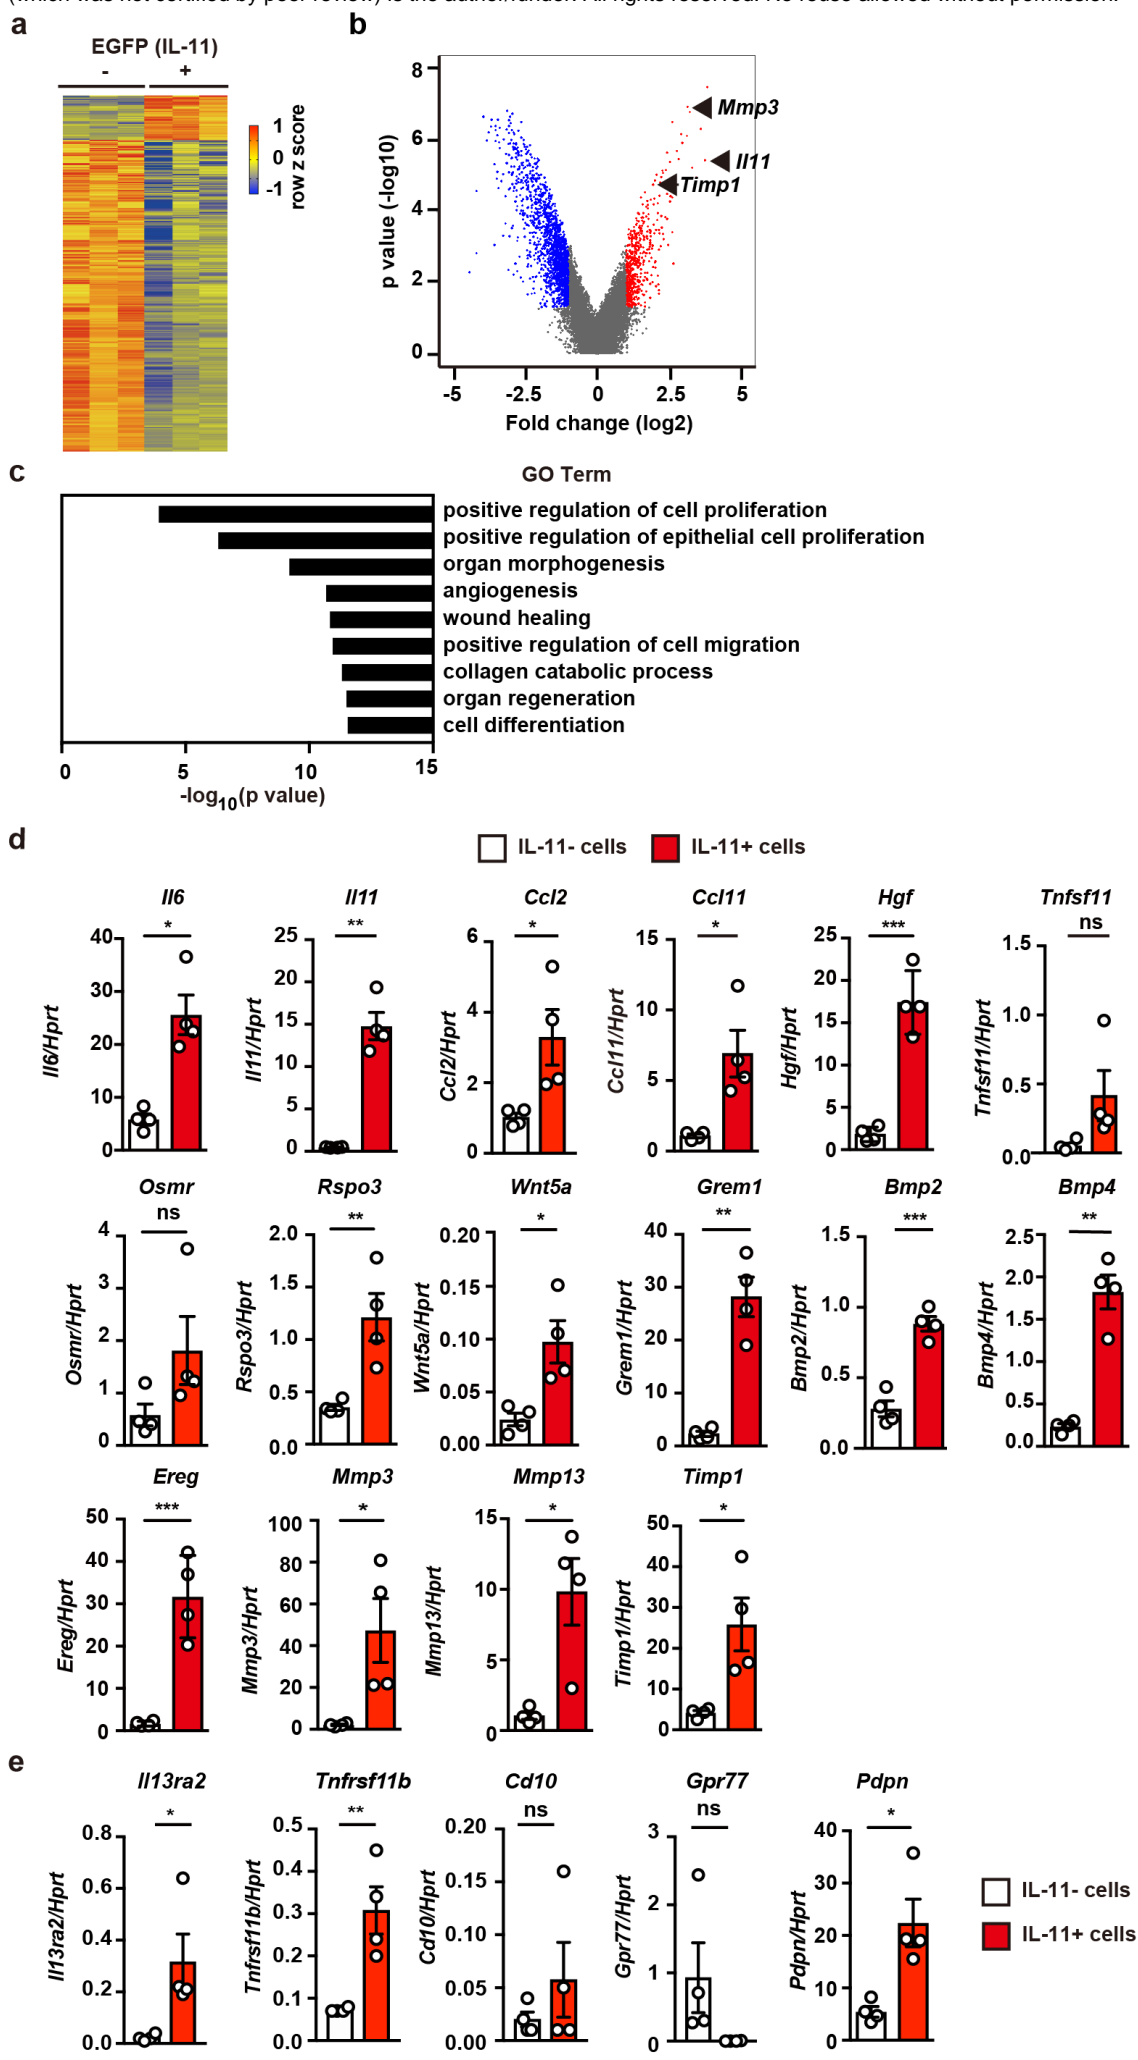



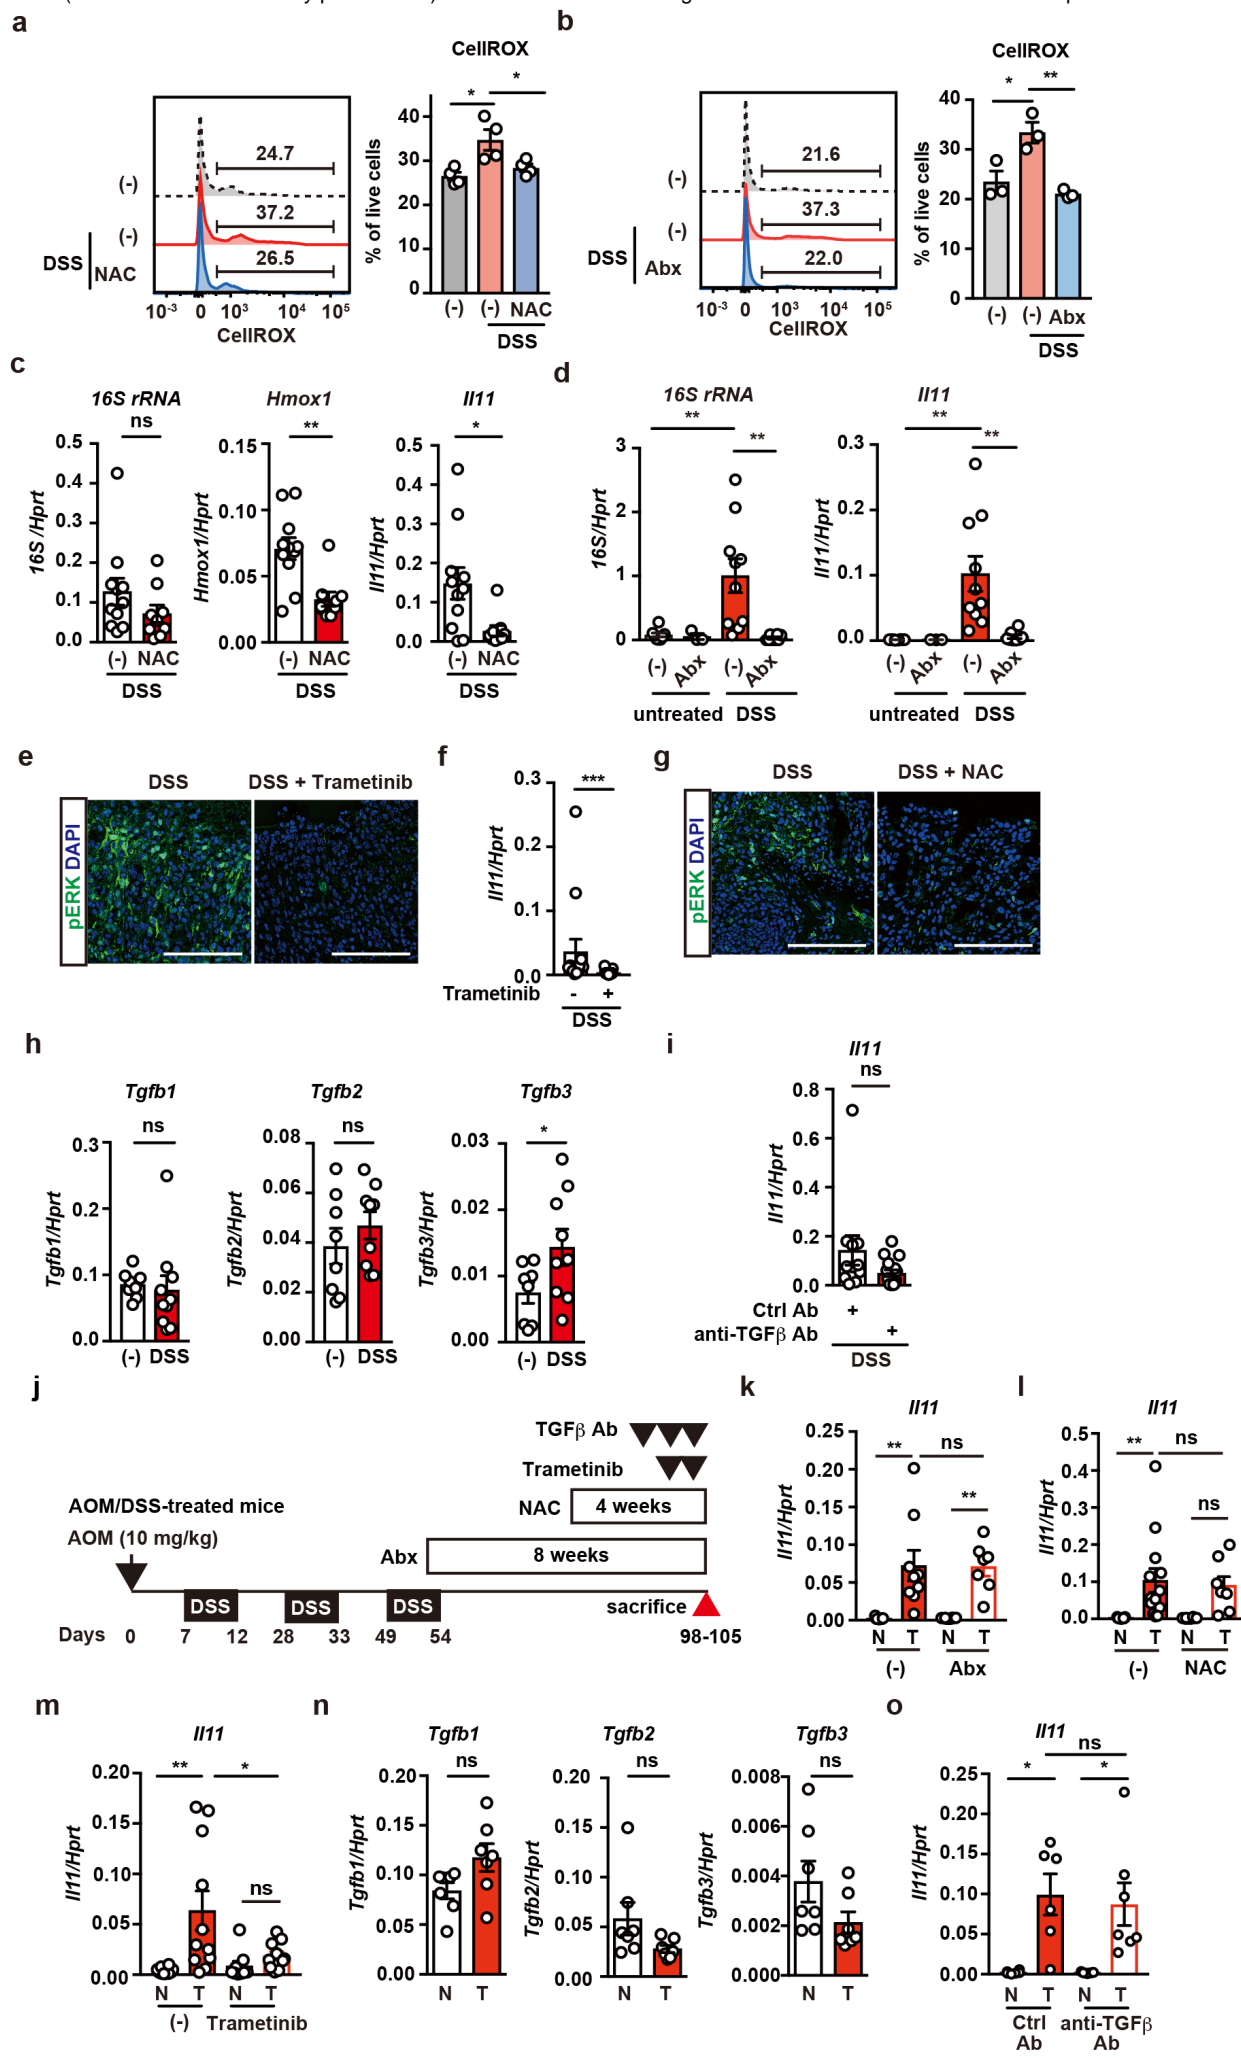

**a**

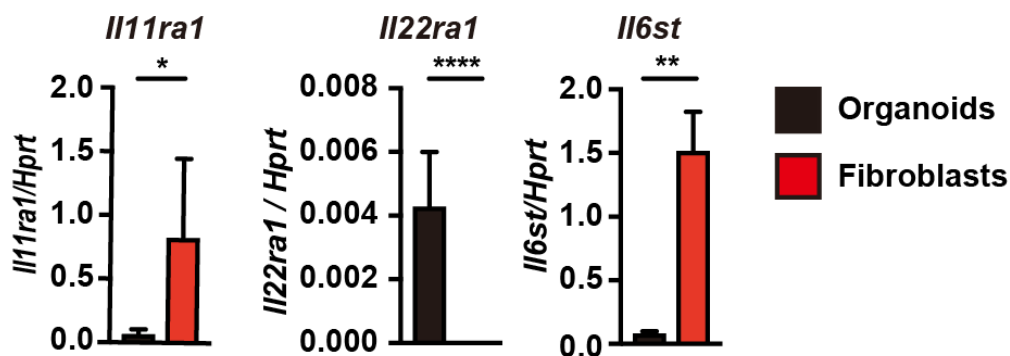

**b**

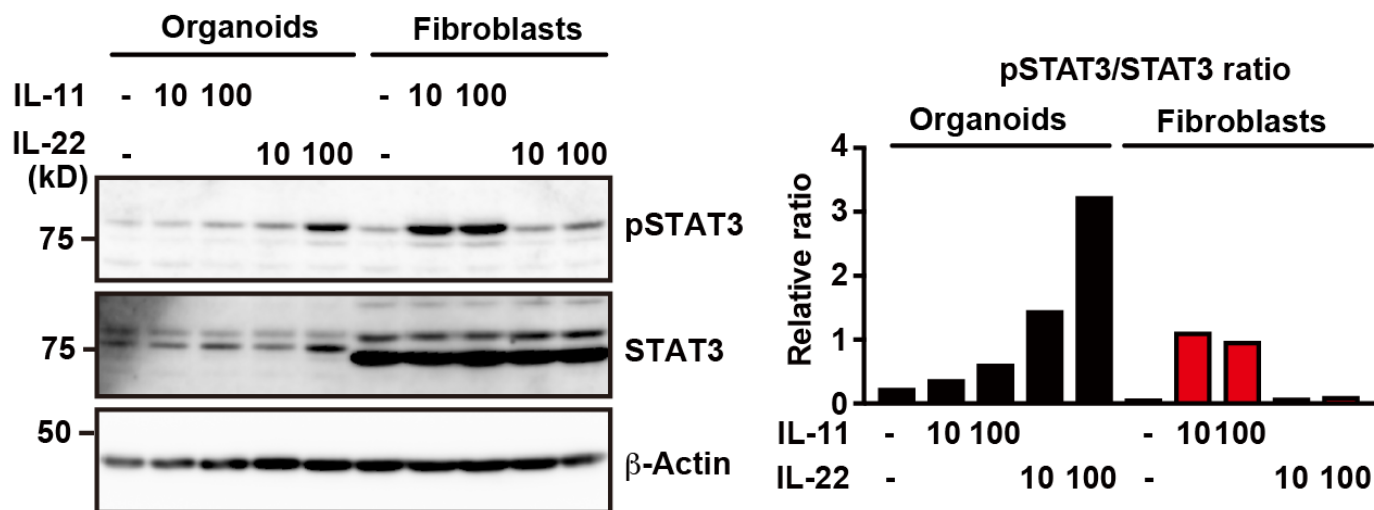

**c**

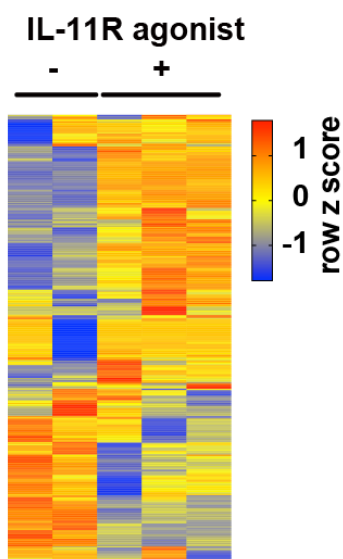

**d**

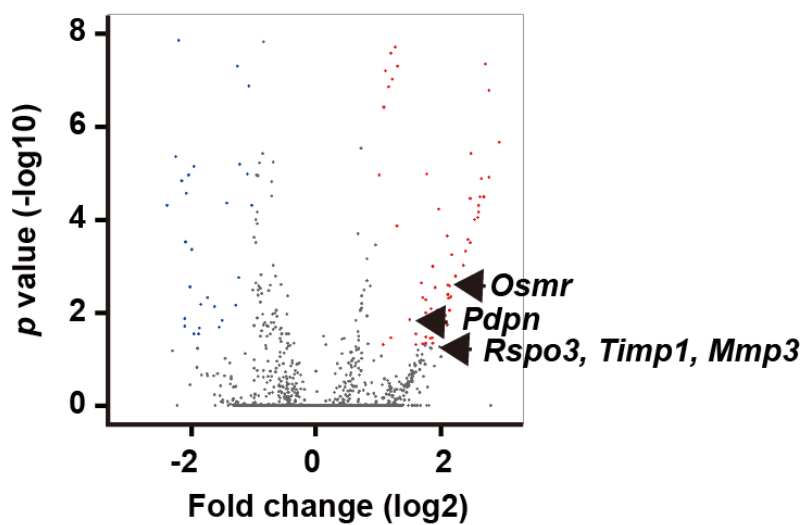

**e**

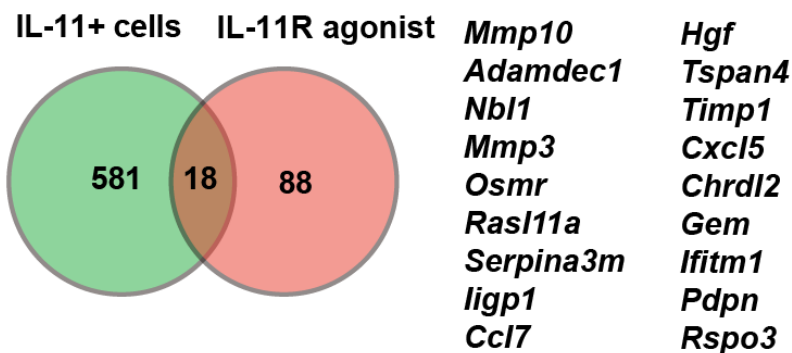

a

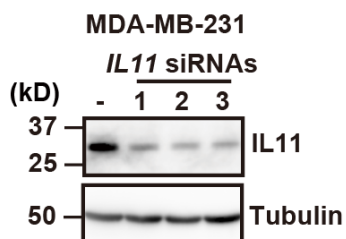

b

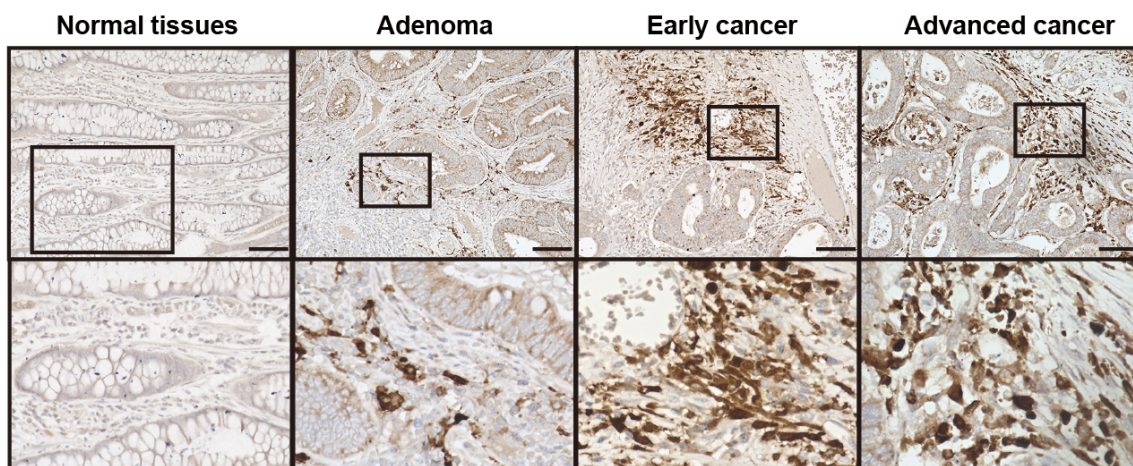

c

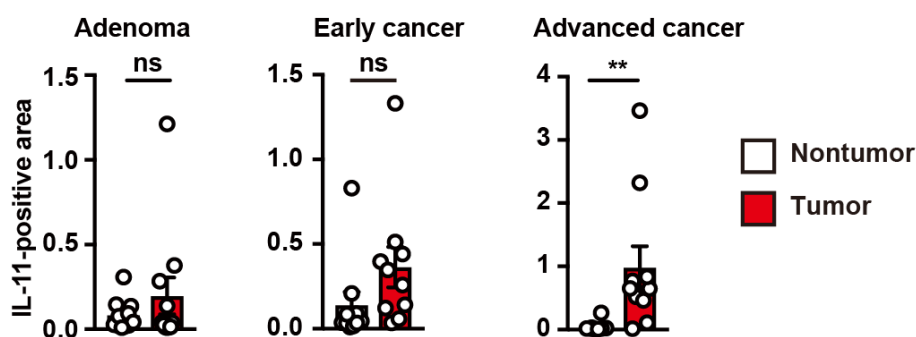

d

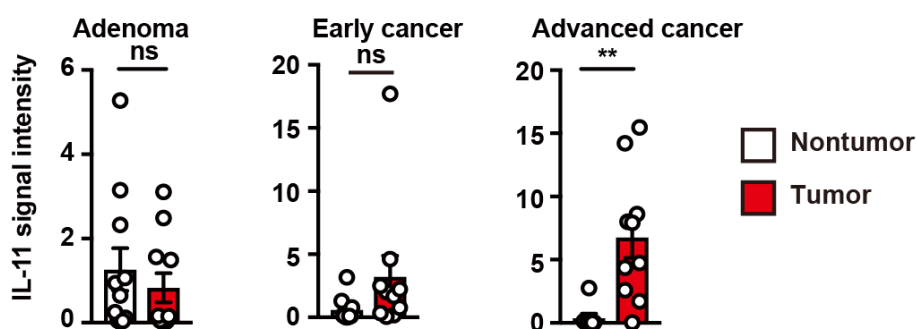

e

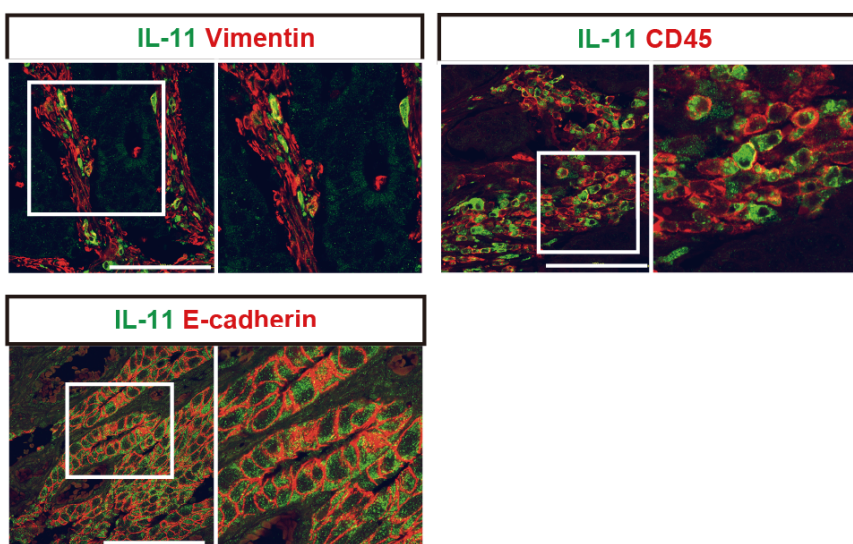

Source: https://www.biorxiv.org/content/10.1101/2020.01.25.919795v1.full.pdf
